# Supplementary material for: Effects of Germination on Protein, γ-Aminobutyric Acid, Phenolic Acids, and Antioxidant Capacity in Wheat
Source: MDPI journal article supplement (doi:10.3390/molecules23092244), 2018-09-03
Supplement: s1 [file s1]

Protein View: XP\_010066854.1

PREDICTED: beta-glucosidase 40 [Eucalyptus grandis]

Database:NCBIprot

Score:63

Expect:2.7

Monoisotopic mass (M<sub>r</sub>):57772

Calculated pI:6.36

Taxonomy:[Eucalyptus grandis](#)

This protein sequence matches the following other entries:

- [KCW64896.1](#) from [Eucalyptus grandis](#)

Sequence similarity is available as [an NCBI BLAST search of XP\\_010066854.1 against nr](#).

Search parameters

Enzyme:Trypsin: cuts C-term side of KR unless next residue is P.

Fixed modifications:[Carbamidomethyl \(C\)](#)

Variable modifications:[Oxidation \(M\)](#)

Mass values searched:23

Mass values matched:7

Protein sequence coverage: 21%

Matched peptides shown in ***bold red***.

1MERYRPR**AAA ASAMMAGLLA GLLVHACCAD AIGR**SSFFPKGFVFGTASSAF

51QYEGAVKEDGRGPSVWDTFSHQFGKVIDLSNADVAVDQYHRFNEDIQLMK

101DMGMDAYRFSISWSRIFFNGSQINQAGVDHYNLNINALLAKGIEPYVTL

151FHWDLFQALEDKYNGWLDPOIIKDFATYAE

201TLAIQGYDVG

251VYRKKYKQKQHGSIGVAFDVMWFEVPR**TNST DDIEATQ**RALDFQFGWFIEP

301LIFGNYPSSMISRVGSRLPAISSSESALLKGSLDFVGINHYTTYYGSDNT

351SDVIGSLLKDSLSDSGSVTL

401**NYIKTK**YGNPVVIITENGMDDPNPPLINIKEALKDEKR**IK YHNDYLTNLL**

451**ASIKEDGCNV KGYFVWSLLD NWEWAAGYTS**RFGLYFVDYNDKLKRYPK**DS**

501**VQWFK**NFLKST

Unformatted sequence string: [511 residues](#) (for pasting into other applications).

Sort by☒ residue number☐ increasing mass☐ decreasing mass

Show☒ matched peptides only☐ predicted peptides also

| Start – End | Observed  | Mr (expt) | Mr (calc) | Delta M   | Peptide                                         |
|-------------|-----------|-----------|-----------|-----------|-------------------------------------------------|
| 8 – 34      | 2658.2607 | 2657.2535 | 2657.2910 | -0.0375 0 | R.AAAASAMMAGLLAGLLVHACCADAIGR.S + Oxidation (M) |
| 217 – 226   | 1318.6462 | 1317.6389 | 1317.6686 | -0.0297 0 | R.CSILLHLFCR.A                                  |
| 277 – 288   | 1350.6440 | 1349.6367 | 1349.6059 | 0.0308 0  | R.TNSTDDIEATQR.A                                |
| 398 – 406   | 1097.4415 | 1096.4342 | 1096.5950 | -0.1608 1 | R.SLMNYIKTK.Y                                   |
| 439 – 454   | 1905.9754 | 1904.9681 | 1905.0359 | -0.0679 1 | R.IKYHNDYLTNLLASIK.E                            |
| 455 – 481   | 3223.3126 | 3222.3054 | 3222.4505 | -0.1452 1 | K.EDGCNVKGYFVWSLLDNWEWAAGYTSR.F                 |
| 499 – 505   | 909.3471  | 908.3398  | 908.4392  | -0.0994 0 | K.DSVQWFK.N                                     |

No match to: 842.3830, 856.3992, 870.4262, 948.3295, 1125.4659, 1187.6122, 1232.5516, 1326.6202, 1339.5863, 1372.6291, 1650.8046, 1766.7704, 1794.7974, 2055.9753, 2211.1043, 3621.4175

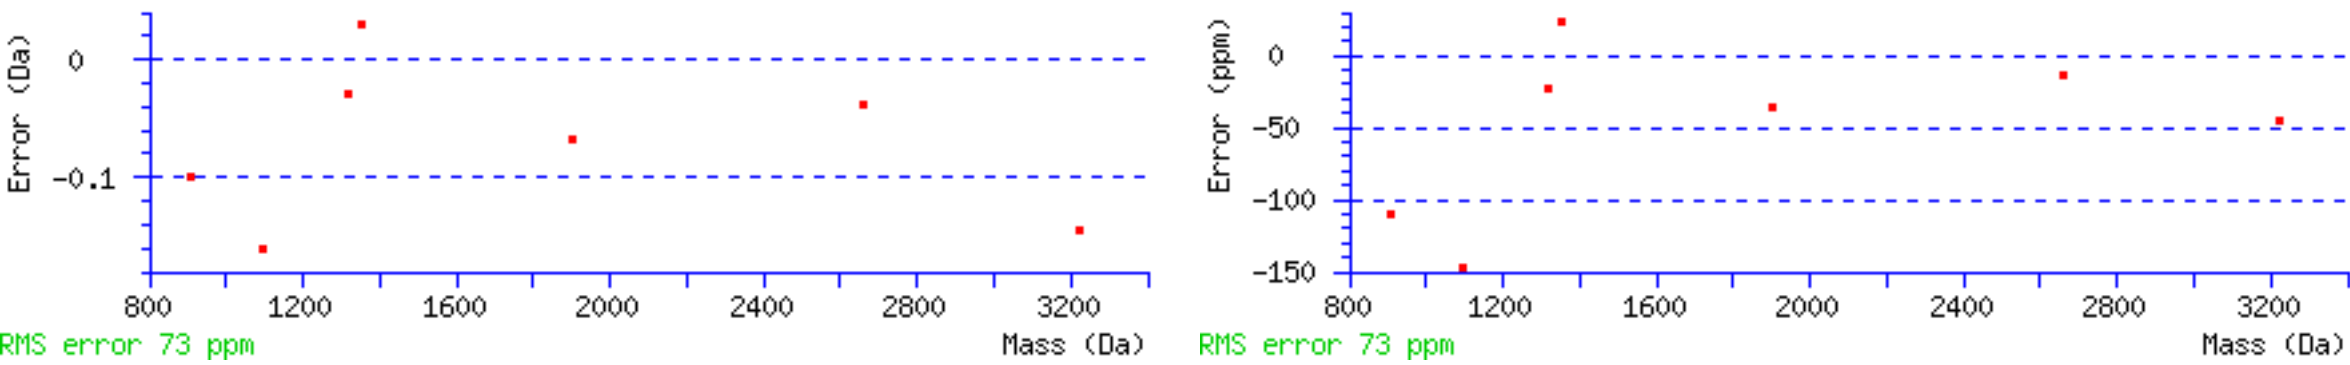

|            |                                                                                                                                                                                                                                                                                                                                                                                                                                                          |        |        |                 |
|------------|----------------------------------------------------------------------------------------------------------------------------------------------------------------------------------------------------------------------------------------------------------------------------------------------------------------------------------------------------------------------------------------------------------------------------------------------------------|--------|--------|-----------------|
| LOCUS      | XP_010066854                                                                                                                                                                                                                                                                                                                                                                                                                                             | 511 aa | linear | PLN 25-OCT-2016 |
| DEFINITION | PREDICTED: beta-glucosidase 40 [Eucalyptus grandis].                                                                                                                                                                                                                                                                                                                                                                                                     |        |        |                 |
| ACCESSION  | XP_010066854                                                                                                                                                                                                                                                                                                                                                                                                                                             |        |        |                 |
| VERSION    | XP_010066854.1                                                                                                                                                                                                                                                                                                                                                                                                                                           |        |        |                 |
| DBLINK     | BioProject: PRJNA264012                                                                                                                                                                                                                                                                                                                                                                                                                                  |        |        |                 |
| DBSOURCE   | REFSEQ: accession XM_010068552.2                                                                                                                                                                                                                                                                                                                                                                                                                         |        |        |                 |
| KEYWORDS   | RefSeq.                                                                                                                                                                                                                                                                                                                                                                                                                                                  |        |        |                 |
| SOURCE     | Eucalyptus grandis                                                                                                                                                                                                                                                                                                                                                                                                                                       |        |        |                 |
| ORGANISM   | Eucalyptus grandis                                                                                                                                                                                                                                                                                                                                                                                                                                       |        |        |                 |
|            | Eukaryota; Viridiplantae; Streptophyta; Embryophyta; Tracheophyta; Spermatophyta; Magnoliophyta; eudicotyledons; Gunneridae; Pentapetalae; rosids; malvids; Myrtales; Myrtaceae; Myrtoideae; Eucalypteae; Eucalyptus.                                                                                                                                                                                                                                    |        |        |                 |
| COMMENT    | MODEL REFSEQ: This record is predicted by automated computational analysis. This record is derived from a genomic sequence (NW_010092444.1) annotated using gene prediction method: Gnomon, supported by EST evidence.<br>Also see:<br>Documentation of NCBI's Annotation Process                                                                                                                                                                        |        |        |                 |
|            | ##Genome-Annotation-Data-START##<br>Annotation Provider :: NCBI<br>Annotation Status :: Full annotation<br>Annotation Version :: Eucalyptus grandis Annotation Release 101<br>Annotation Pipeline :: NCBI eukaryotic genome annotation pipeline<br>Annotation Software Version :: 7.2<br>Annotation Method :: Best-placed RefSeq; Gnomon<br>Features Annotated :: Gene; mRNA; CDS; ncRNA<br>##Genome-Annotation-Data-END##<br>COMPLETENESS: full length. |        |        |                 |
| FEATURES   | Location/Qualifiers                                                                                                                                                                                                                                                                                                                                                                                                                                      |        |        |                 |
| source     | 1..511<br>/organism="Eucalyptus grandis"<br>/cultivar="BRASUZ1"<br>/db_xref="taxon:71139"<br>/chromosome="Unknown"<br>/tissue_type="leaf extractions"<br>/country="Brazil"<br>/collection_date="Dec-2008"<br>/note="individual tree from a line of selfed trees grown from seeds collected in Coffs Harbor, Australia"                                                                                                                                   |        |        |                 |
| Protein    | 1..511<br>/product="beta-glucosidase 40"<br>/calculated_mol_wt=57335                                                                                                                                                                                                                                                                                                                                                                                     |        |        |                 |
| Region     | 34..510<br>/region_name="Glyco_hydro_1"<br>/note="Glycosyl hydrolase family 1; c123725"<br>/db_xref="CDD:304882"                                                                                                                                                                                                                                                                                                                                         |        |        |                 |
| CDS        | 1..511<br>/gene="LOC104453907"<br>/coded_by="XM_010068552.2:286..1821"<br>/db_xref="GeneID:104453907"                                                                                                                                                                                                                                                                                                                                                    |        |        |                 |
