# Supplementary material for: Effects of Germination on Protein, γ-Aminobutyric Acid, Phenolic Acids, and Antioxidant Capacity in Wheat
Source: MDPI journal article supplement (doi:10.3390/molecules23092244), 2018-09-03
Supplement: s1 [file s1]

### **Figure captions**

**Supplementary figure 1.** Images of protein spots produced by two dimensional gel electrophoresis of wheat samples germinated for various periods (24, 48, 72, and 96 h) and control.

**Supplementary figure 2.** Heated map represented with relative intensity of selected spot proteins (SSP) from two dimensional gel electrophoresis of wheat samples germinated for various periods (24, 48, 72, and 96 h) in comparison to that of control. (I, II, III, and IV regions represent (I) high molecular weight-glutenin subunit, (II)  $\omega$ -gliadins, (III)  $\alpha/\beta$  and  $\gamma$  gliadins and low molecular weight glutenin subunit; (IV) non-storage proteins, respectively.)





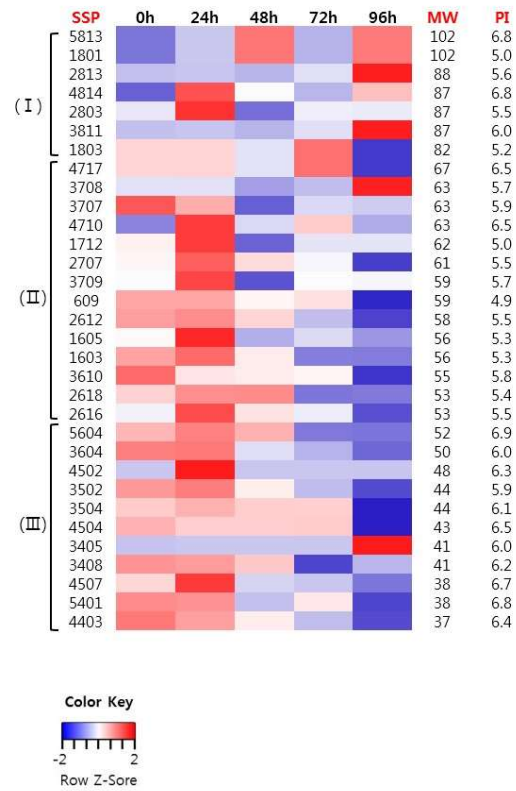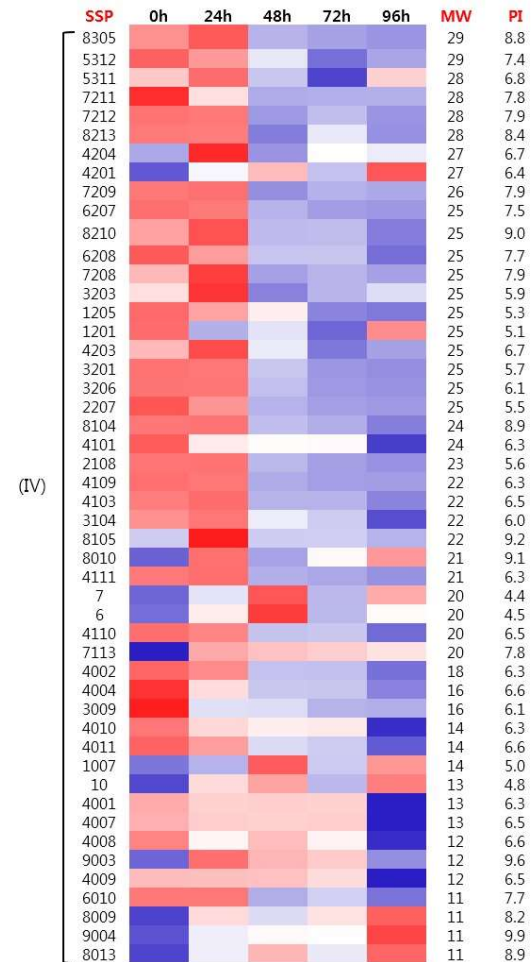

Supplementary figure 2
