# Supplementary material for: Effects of Germination on Protein, γ-Aminobutyric Acid, Phenolic Acids, and Antioxidant Capacity in Wheat
Source: MDPI journal article supplement (doi:10.3390/molecules23092244), 2018-09-03
Supplement: s1 [file s1]

Protein View: AAP70009.1

cytosolic malate dehydrogenase, partial [Triticum aestivum]

Database: NCBIprot  
Score: 98  
Expect: 0.00096  
Monoisotopic mass (M<sub>r</sub>): 24560  
Calculated pI: 6.60  
Taxonomy: [Triticum aestivum](#)

Sequence similarity is available as [an NCBI BLAST search of AAP70009.1 against nr](#).

Search parameters

Enzyme: Trypsin: cuts C-term side of KR unless next residue is P.  
Fixed modifications: [Carbamidomethyl \(C\)](#)  
Variable modifications: [Oxidation \(M\)](#)  
Mass values searched: 11  
Mass values matched: 6

Protein sequence coverage: 41%

Matched peptides shown in ***bold red***.

1 MLGADQPVIL HMLDIEFAAE ALKGVK**MELI DAAFPLLK**GV VATTDVVEAC  
51 TGVNVAVMVG GFPRKEGMER KDVMTKNVS IYKAQASALEA HAAPNCK**VLV**  
101 **VANPANTNAL ILKEFAPSIP EKNISCLTRL** DHNRALGQIS ERLGVQVSDV  
151 **KNAIIWGNHS SSQYPDVNHA TVKTPSGEKP VRELVDDEW LNGEFIATVQ**  
201 **QR**GAAIIKAR KLSSALSAAS SACDHIR

Unformatted sequence string: [227 residues](#) (for pasting into other applications).

Sort by ☒ residue number ☐ increasing mass ☐ decreasing mass  
Show ☒ matched peptides only ☐ predicted peptides also

| Start – End | Observed  | Mr (expt) | Mr (calc) | Delta M   | Peptide                          |
|-------------|-----------|-----------|-----------|-----------|----------------------------------|
| 27 – 38     | 1360.7031 | 1359.6958 | 1359.7472 | -0.0514 0 | K.MELIDAAFPLLK.G                 |
| 98 – 113    | 1649.9419 | 1648.9346 | 1648.9876 | -0.0530 0 | K.VLVVANPANTNALILK.E             |
| 114 – 129   | 1861.9237 | 1860.9164 | 1860.9404 | -0.0239 1 | K.EFAPSIPEKNISCLTR.L             |
| 152 – 173   | 2438.1844 | 2437.1771 | 2437.1775 | -0.0003 0 | K.NAIIWGNHSSSQYPDVNHATVK.T       |
| 174 – 202   | 3341.8294 | 3340.8221 | 3340.6688 | 0.1533 1  | K.TPSGEKPVRELVDDEWLNGEFIATVQQR.G |
| 183 – 202   | 2390.1531 | 2389.1458 | 2389.1550 | -0.0092 0 | R.ELVDDEWLNGEFIATVQQR.G          |

No match to: 1350.6246, 1641.7904, 1905.9620, 2211.1040, 2373.1022

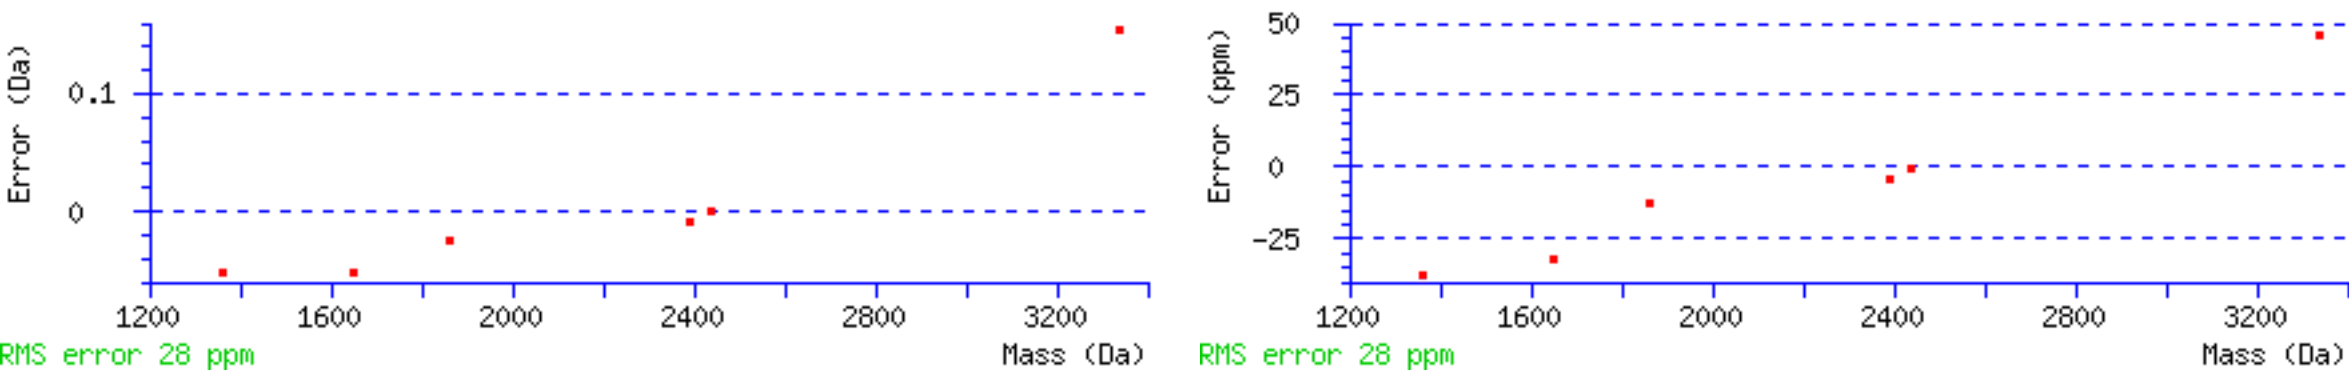

|            |                                                                                                                                                                                                    |        |        |                 |
|------------|----------------------------------------------------------------------------------------------------------------------------------------------------------------------------------------------------|--------|--------|-----------------|
| LOCUS      | AAP70009                                                                                                                                                                                           | 227 aa | linear | PLN 26-JUL-2016 |
| DEFINITION | cytosolic malate dehydrogenase, partial [Triticum aestivum].                                                                                                                                       |        |        |                 |
| ACCESSION  | AAP70009                                                                                                                                                                                           |        |        |                 |
| VERSION    | AAP70009.1                                                                                                                                                                                         |        |        |                 |
| DBSOURCE   | accession AY236152.1                                                                                                                                                                               |        |        |                 |
| KEYWORDS   | .                                                                                                                                                                                                  |        |        |                 |
| SOURCE     | Triticum aestivum (bread wheat)                                                                                                                                                                    |        |        |                 |
| ORGANISM   | Triticum aestivum                                                                                                                                                                                  |        |        |                 |
|            | Eukaryota; Viridiplantae; Streptophyta; Embryophyta; Tracheophyta; Spermatophyta; Magnoliophyta; Liliopsida; Poales; Poaceae; BOP clade; Pooideae; Triticodae; Triticeae; Triticinae; Triticum.    |        |        |                 |
| REFERENCE  | 1 (residues 1 to 227)                                                                                                                                                                              |        |        |                 |
| AUTHORS    | Ma,Q.-H.                                                                                                                                                                                           |        |        |                 |
| TITLE      | Characterization of a cytosolic malate dehydrogenase cDNA from wheat                                                                                                                               |        |        |                 |
| JOURNAL    | Unpublished                                                                                                                                                                                        |        |        |                 |
| REFERENCE  | 2 (residues 1 to 227)                                                                                                                                                                              |        |        |                 |
| AUTHORS    | Ma,Q.-H. Sr.                                                                                                                                                                                       |        |        |                 |
| TITLE      | Direct Submission                                                                                                                                                                                  |        |        |                 |
| JOURNAL    | Submitted (13-FEB-2003) Key Laboratory of Photosynthesis and Environmental Molecular Physiology, Institute of Botany, Chinese Academy of Sciences, 20 Nanxin Cun, Xiangshan, Beijing 100093, China |        |        |                 |
| COMMENT    | Method: conceptual translation supplied by author.                                                                                                                                                 |        |        |                 |
| FEATURES   | Location/Qualifiers                                                                                                                                                                                |        |        |                 |
| source     | 1..227                                                                                                                                                                                             |        |        |                 |
|            | /organism="Triticum aestivum"                                                                                                                                                                      |        |        |                 |
|            | /cultivar="H4564"                                                                                                                                                                                  |        |        |                 |
|            | /db_xref="taxon:4565"                                                                                                                                                                              |        |        |                 |
| Protein    | <1..>227                                                                                                                                                                                           |        |        |                 |
|            | /product="cytosolic malate dehydrogenase"                                                                                                                                                          |        |        |                 |
|            | /EC_number="1.1.1.37"                                                                                                                                                                              |        |        |                 |
| Region     | 1..>227                                                                                                                                                                                            |        |        |                 |
|            | /region_name="NADB_Rossmann"                                                                                                                                                                       |        |        |                 |
|            | /note="Rossmann-fold NAD(P)(+)-binding proteins; c121454"                                                                                                                                          |        |        |                 |
|            | /db_xref="CDD:304358"                                                                                                                                                                              |        |        |                 |
| Site       | order(14..15,59..60,80,101..103,127,130,159,218)                                                                                                                                                   |        |        |                 |
|            | /site_type="other"                                                                                                                                                                                 |        |        |                 |
|            | /note="NAD(P) binding site [chemical binding]"                                                                                                                                                     |        |        |                 |
|            | /db_xref="CDD:133419"                                                                                                                                                                              |        |        |                 |
| Site       | order(21,25,27..28,30..32,133..134,136..137,143,220,224)                                                                                                                                           |        |        |                 |
|            | /site_type="other"                                                                                                                                                                                 |        |        |                 |
|            | /note="LDH/MDH dimer interface [polypeptide binding]"                                                                                                                                              |        |        |                 |
|            | /db_xref="CDD:133419"                                                                                                                                                                              |        |        |                 |
| Site       | order(103,134,159)                                                                                                                                                                                 |        |        |                 |
|            | /site_type="other"                                                                                                                                                                                 |        |        |                 |
|            | /note="substrate binding site [chemical binding]"                                                                                                                                                  |        |        |                 |
|            | /db_xref="CDD:133419"                                                                                                                                                                              |        |        |                 |
| CDS        | 1..227                                                                                                                                                                                             |        |        |                 |
|            | /coded_by="AY236152.1:<1..>683"                                                                                                                                                                    |        |        |                 |
