# Supplementary material for: Effects of Germination on Protein, γ-Aminobutyric Acid, Phenolic Acids, and Antioxidant Capacity in Wheat
Source: MDPI journal article supplement (doi:10.3390/molecules23092244), 2018-09-03
Supplement: s1 [file s1]

Protein View: XP\_022553271.1

glutathione S-transferase T3-like [Brassica napus]

Database: NCBIprot  
Score: 54  
Expect: 21  
Monoisotopic mass (M<sub>r</sub>): 23636  
Calculated pI: 8.83  
Taxonomy: [Brassica napus](#)

Sequence similarity is available as [an NCBI BLAST search of XP\\_022553271.1 against nr](#).

Search parameters

Enzyme: Trypsin: cuts C-term side of KR unless next residue is P.  
Fixed modifications: [Carbamidomethyl \(C\)](#)  
Variable modifications: [Oxidation \(M\)](#)  
Mass values searched: 10  
Mass values matched: 4

Protein sequence coverage: 22%

Matched peptides shown in ***bold red***.

1 MVNSSTSFIN LLASQGVIDL DSSEPPCVSS QGVASQCSDE ATVKEKRK**WS**  
51 **PKEDIILIGA WLNTSKDPIV SNEQK**GLAFW KRIVENYNSS PLLVGTIPRE  
101 LGQVKKR**WAR INDLVCKFSG SYEMAL**REQR SGQNDNDVMK AALEIFFNDK  
151 GFKFNLEHAW RELRHDVKWC STFLGKDSGK DKRKTGASDA GGSVTEPQER  
201 PIGVKAAKAA GG

Unformatted sequence string: [212 residues](#) (for pasting into other applications).

Sort by ☒ residue number ☐ increasing mass ☐ decreasing mass  
Show ☒ matched peptides only ☐ predicted peptides also

| Start – End | Observed  | Mr (expt) | Mr (calc) | Delta M   | Peptide                |
|-------------|-----------|-----------|-----------|-----------|------------------------|
| 49 – 66     | 2070.9956 | 2069.9883 | 2070.1149 | -0.1266 1 | K.WSPKEDIILIGAWLNTSK.D |
| 67 – 75     | 1029.4253 | 1028.4180 | 1028.5138 | -0.0958 0 | K.DPIVSNEQK.G          |
| 108 – 117   | 1274.6806 | 1273.6734 | 1273.6601 | 0.0132 1  | R.WARINDLVCK.F         |
| 111 – 127   | 2002.8759 | 2001.8687 | 2001.9652 | -0.0965 1 | R.INDLVCKFSGSYEMALR.E  |

No match to: 1306.6755, 1406.7560, 1529.7144, 1819.8732, 1980.9026, 2211.1028

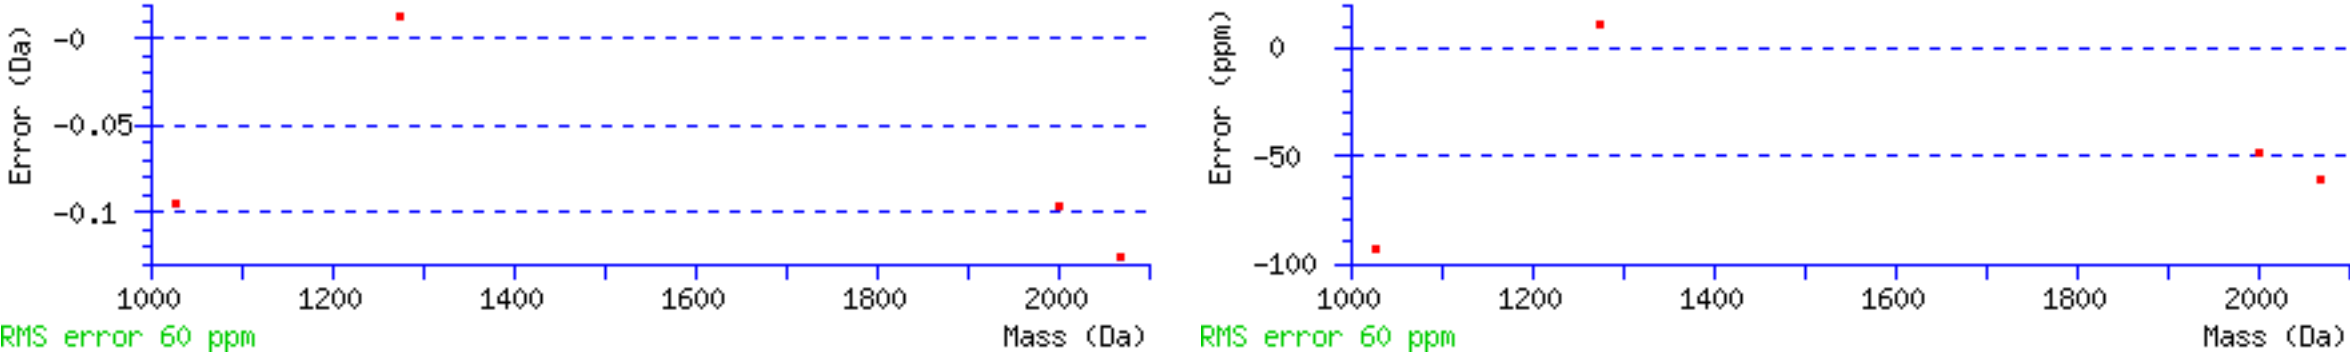

|            |                                                                                                                                                                                                                                               |        |        |                 |
|------------|-----------------------------------------------------------------------------------------------------------------------------------------------------------------------------------------------------------------------------------------------|--------|--------|-----------------|
| LOCUS      | XP_022553271                                                                                                                                                                                                                                  | 212 aa | linear | PLN 04-OCT-2017 |
| DEFINITION | glutathione S-transferase T3-like [Brassica napus].                                                                                                                                                                                           |        |        |                 |
| ACCESSION  | XP_022553271                                                                                                                                                                                                                                  |        |        |                 |
| VERSION    | XP_022553271.1                                                                                                                                                                                                                                |        |        |                 |
| DBLINK     | BioProject: PRJNA293435                                                                                                                                                                                                                       |        |        |                 |
| DBSOURCE   | REFSEQ: accession XM_022697550.1                                                                                                                                                                                                              |        |        |                 |
| KEYWORDS   | RefSeq; includes ab initio.                                                                                                                                                                                                                   |        |        |                 |
| SOURCE     | Brassica napus (rape)                                                                                                                                                                                                                         |        |        |                 |
| ORGANISM   | Brassica napus                                                                                                                                                                                                                                |        |        |                 |
|            | Eukaryota; Viridiplantae; Streptophyta; Embryophyta; Tracheophyta; Spermatophyta; Magnoliophyta; eudicotyledons; Gunneridae; Pentapetalae; rosids; malvids; Brassicales; Brassicaceae; Brassiceae; Brassica.                                  |        |        |                 |
| COMMENT    | MODEL REFSEQ: This record is predicted by automated computational analysis. This record is derived from a genomic sequence (NC_027769.2) annotated using gene prediction method: Gnomon. Also see: Documentation of NCBI's Annotation Process |        |        |                 |
|            | ##Genome-Annotation-Data-START##                                                                                                                                                                                                              |        |        |                 |
|            | Annotation Provider :: NCBI                                                                                                                                                                                                                   |        |        |                 |
|            | Annotation Status :: Full annotation                                                                                                                                                                                                          |        |        |                 |
|            | Annotation Version :: Brassica napus Annotation Release 101                                                                                                                                                                                   |        |        |                 |
|            | Annotation Pipeline :: NCBI eukaryotic genome annotation pipeline                                                                                                                                                                             |        |        |                 |
|            | Annotation Software Version :: 7.4                                                                                                                                                                                                            |        |        |                 |
|            | Annotation Method :: Best-placed RefSeq; Gnomon                                                                                                                                                                                               |        |        |                 |
|            | Features Annotated :: Gene; mRNA; CDS; ncRNA                                                                                                                                                                                                  |        |        |                 |
|            | ##Genome-Annotation-Data-END##                                                                                                                                                                                                                |        |        |                 |
|            | ##RefSeq-Attributes-START##                                                                                                                                                                                                                   |        |        |                 |
|            | ab initio :: 100% of CDS bases                                                                                                                                                                                                                |        |        |                 |
|            | ##RefSeq-Attributes-END##                                                                                                                                                                                                                     |        |        |                 |
|            | COMPLETENESS: full length.                                                                                                                                                                                                                    |        |        |                 |
| FEATURES   | Location/Qualifiers                                                                                                                                                                                                                           |        |        |                 |
| source     | 1..212                                                                                                                                                                                                                                        |        |        |                 |
|            | /organism="Brassica napus"                                                                                                                                                                                                                    |        |        |                 |
|            | /cultivar="ZS11"                                                                                                                                                                                                                              |        |        |                 |
|            | /db_xref="taxon:3708"                                                                                                                                                                                                                         |        |        |                 |
|            | /chromosome="C3"                                                                                                                                                                                                                              |        |        |                 |
| Protein    | 1..212                                                                                                                                                                                                                                        |        |        |                 |
|            | /product="glutathione S-transferase T3-like"                                                                                                                                                                                                  |        |        |                 |
|            | /calculated_mol_wt=23291                                                                                                                                                                                                                      |        |        |                 |
| Region     | <80..108                                                                                                                                                                                                                                      |        |        |                 |
|            | /region_name="GT1"                                                                                                                                                                                                                            |        |        |                 |
|            | /note="myb-like, SANT family; cl23759"                                                                                                                                                                                                        |        |        |                 |
|            | /db_xref="CDD:329061"                                                                                                                                                                                                                         |        |        |                 |
| Region     | 153..>210                                                                                                                                                                                                                                     |        |        |                 |
|            | /region_name="NAM-associated"                                                                                                                                                                                                                 |        |        |                 |
|            | /note="No apical meristem-associated C-terminal domain; pfam14303"                                                                                                                                                                            |        |        |                 |
|            | /db_xref="CDD:316794"                                                                                                                                                                                                                         |        |        |                 |
| CDS        | 1..212                                                                                                                                                                                                                                        |        |        |                 |
|            | /gene="LOC111203635"                                                                                                                                                                                                                          |        |        |                 |
|            | /coded_by="XM_022697550.1:1..639"                                                                                                                                                                                                             |        |        |                 |
|            | /db_xref="GeneID:111203635"                                                                                                                                                                                                                   |        |        |                 |
