# Supplementary material for: Effects of Germination on Protein, γ-Aminobutyric Acid, Phenolic Acids, and Antioxidant Capacity in Wheat
Source: MDPI journal article supplement (doi:10.3390/molecules23092244), 2018-09-03
Supplement: s1 [file s1]

Protein View: ABI54569.1

dimeric alpha-amylase inhibitor, partial [Aegilops sharonensis]

Database: NCBIprot  
Score: 87  
Expect: 0.012  
Monoisotopic mass (M<sub>r</sub>): 13891  
Calculated pI: 5.25  
Taxonomy: [Aegilops sharonensis](#)

This protein sequence matches the following other entries:

- ABI54595.1 from [Aegilops longissima](#)
- ABI54596.1 from [Aegilops longissima](#)
- ABI54602.1 from [Aegilops longissima](#)

Sequence similarity is available as [an NCBI BLAST search of ABI54569.1 against nr.](#)

Search parameters

Enzyme: Trypsin: cuts C-term side of KR unless next residue is P.  
Fixed modifications: [Carbamidomethyl \(C\)](#)  
Variable modifications: [Oxidation \(M\)](#)  
Mass values searched: 11  
Mass values matched: 5

Protein sequence coverage: 55%

Matched peptides shown in **bold red**.

1 SGPWMCYPGQ AFQVPALPGC RPLLR**LQCNG SQVPEAVLR**D CCQQLADISE  
51 WCRCGALYSM LDDMYK**EHGA QEGQAGTGAF** PRCRRE**EVVKL TAASITAVCR**  
101 **LPIIVVDASGD GAYVCKDVAA YPDA**

Unformatted sequence string: [124 residues](#) (for pasting into other applications).

Sort by ☒ residue number ☐ increasing mass ☐ decreasing mass  
Show ☒ matched peptides only ☐ predicted peptides also

| Start – End | Observed  | Mr (expt) | Mr (calc) | Delta M   | Peptide                              |
|-------------|-----------|-----------|-----------|-----------|--------------------------------------|
| 26 – 39     | 1570.7140 | 1569.7068 | 1569.7933 | -0.0866 0 | <b>R.LQCNGSQVPEAVLR.D</b>            |
| 67 – 82     | 1612.7131 | 1611.7059 | 1611.7390 | -0.0331 0 | <b>K.EHGAQEGQAGTGAFPR.C</b>          |
| 86 – 100    | 1617.8114 | 1616.8042 | 1616.8920 | -0.0878 1 | <b>R.EVVKLTAASITAVCR.L</b>           |
| 101 – 116   | 1663.7980 | 1662.7907 | 1662.8287 | -0.0380 0 | <b>R.LPIIVVDASGDGAYVCK.D</b>         |
| 101 – 124   | 2466.2482 | 2465.2409 | 2465.1785 | 0.0625 1  | <b>R.LPIIVVDASGDGAYVCKDVAAYPDA.-</b> |

No match to: 1350.6466, 1372.6162, 1667.7974, 1698.8978, 1715.9218, 2211.1040

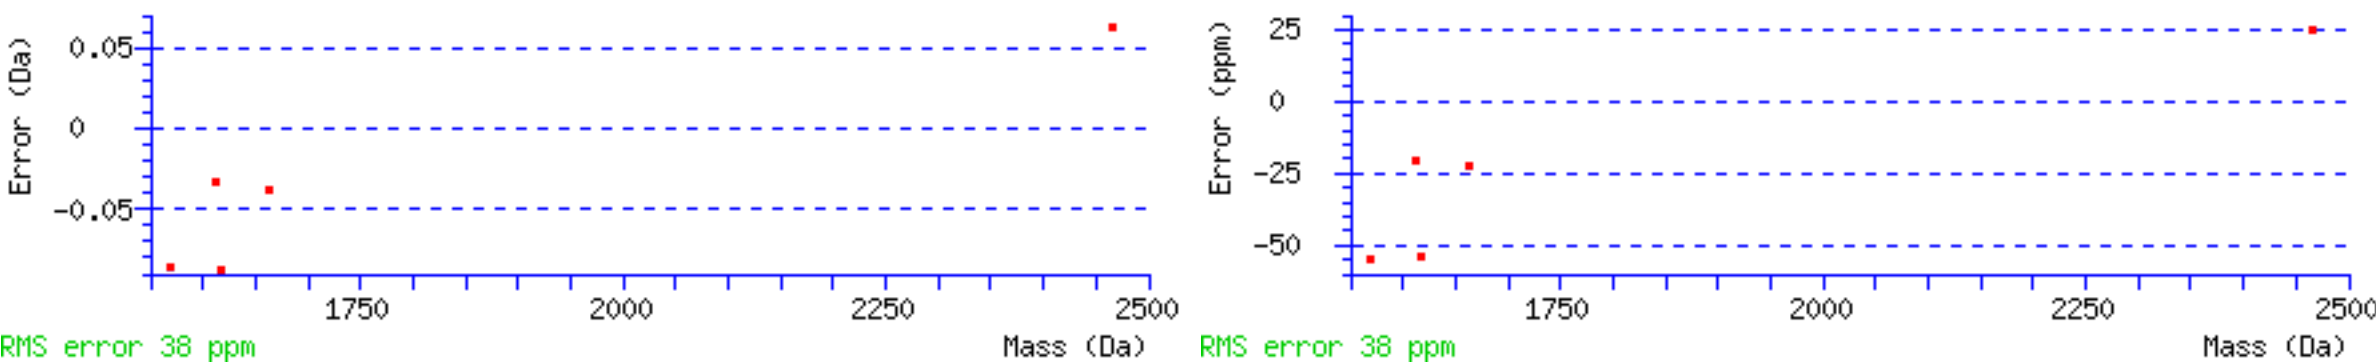

|            |                                                                                                                                                                                                                                                                                                                                           |        |        |                 |
|------------|-------------------------------------------------------------------------------------------------------------------------------------------------------------------------------------------------------------------------------------------------------------------------------------------------------------------------------------------|--------|--------|-----------------|
| LOCUS      | ABI54569                                                                                                                                                                                                                                                                                                                                  | 124 aa | linear | PLN 14-JUL-2016 |
| DEFINITION | dimeric alpha-amylase inhibitor, partial [Aegilops sharonensis].                                                                                                                                                                                                                                                                          |        |        |                 |
| ACCESSION  | ABI54569                                                                                                                                                                                                                                                                                                                                  |        |        |                 |
| VERSION    | ABI54569.1                                                                                                                                                                                                                                                                                                                                |        |        |                 |
| DBSOURCE   | accession DQ856415.1                                                                                                                                                                                                                                                                                                                      |        |        |                 |
| KEYWORDS   | .                                                                                                                                                                                                                                                                                                                                         |        |        |                 |
| SOURCE     | Aegilops sharonensis                                                                                                                                                                                                                                                                                                                      |        |        |                 |
| ORGANISM   | Aegilops sharonensis                                                                                                                                                                                                                                                                                                                      |        |        |                 |
|            | Eukaryota; Viridiplantae; Streptophyta; Embryophyta; Tracheophyta; Spermatophyta; Magnoliophyta; Liliopsida; Poales; Poaceae; BOP clade; Pooideae; Triticodae; Triticeae; Triticinae; Aegilops.                                                                                                                                           |        |        |                 |
| REFERENCE  | 1 (residues 1 to 124)                                                                                                                                                                                                                                                                                                                     |        |        |                 |
| AUTHORS    | Wang,J.R., Zhang,L., Wei,Y.M., Yan,Z.H., Baum,B.R., Nevo,E. and Zheng,Y.L.                                                                                                                                                                                                                                                                |        |        |                 |
| TITLE      | Sequence polymorphisms and relationships of dimeric alpha-amylase inhibitor genes in the B genomes of Triticum and S genomes of Aegilops                                                                                                                                                                                                  |        |        |                 |
| JOURNAL    | Plant Sci. 173 (1), 1-11 (2007)                                                                                                                                                                                                                                                                                                           |        |        |                 |
| REFERENCE  | 2 (residues 1 to 124)                                                                                                                                                                                                                                                                                                                     |        |        |                 |
| AUTHORS    | Wang,J., Wei,Y., Yan,Z. and Zheng,Y.                                                                                                                                                                                                                                                                                                      |        |        |                 |
| TITLE      | Direct Submission                                                                                                                                                                                                                                                                                                                         |        |        |                 |
| JOURNAL    | Submitted (17-JUL-2006) Sichuan Agricultural University, Triticeae Research Institute, Yaan Sichuan China, Yaan, Sichuan 625014, China                                                                                                                                                                                                    |        |        |                 |
| COMMENT    | Method: conceptual translation.                                                                                                                                                                                                                                                                                                           |        |        |                 |
| FEATURES   | Location/Qualifiers                                                                                                                                                                                                                                                                                                                       |        |        |                 |
| source     | 1..124<br>/organism="Aegilops sharonensis"<br>/cultivar="PI584394"<br>/db_xref="taxon:58530"<br>/clone="5"                                                                                                                                                                                                                                |        |        |                 |
| Protein    | <1..124<br>/product="dimeric alpha-amylase inhibitor"                                                                                                                                                                                                                                                                                     |        |        |                 |
| Region     | 3..103<br>/region_name="AAI_SS"<br>/note="AAI_SS: Alpha-Amylase Inhibitors (AAIs) and Seed Storage (SS) Protein subfamily; composed of cereal-type AAIs and SS proteins. They are mainly present in the seeds of a variety of plants. AAIs play an important role in the natural defenses of plants...; cd00261"<br>/db_xref="CDD:238163" |        |        |                 |
| Site       | order(4,49..51,58)<br>/site_type="other"<br>/note="alpha-amylase binding site [polypeptide binding]"<br>/db_xref="CDD:238163"                                                                                                                                                                                                             |        |        |                 |
| Site       | order(38,90,94,100)<br>/site_type="other"<br>/note="dimer interface [polypeptide binding]"<br>/db_xref="CDD:238163"                                                                                                                                                                                                                       |        |        |                 |
| CDS        | 1..124<br>/coded_by="DQ856415.1:<1..375"                                                                                                                                                                                                                                                                                                  |        |        |                 |
