# Supplementary material for: Effects of Germination on Protein, γ-Aminobutyric Acid, Phenolic Acids, and Antioxidant Capacity in Wheat
Source: MDPI journal article supplement (doi:10.3390/molecules23092244), 2018-09-03
Supplement: s1 [file s1]

Protein View: AFG48690.1

hypothetical protein CL3131Contig1\_04, partial [Pinus taeda]

Database: NCBIprot  
Score: 69  
Expect: 0.68  
Monoisotopic mass (M<sub>r</sub>): 7501  
Calculated pI: 4.42  
Taxonomy: [Pinus taeda](#)

This protein sequence matches the following other entries:

- AFG48691.1 from [Pinus taeda](#)
- AFG48692.1 from [Pinus taeda](#)
- AFG48693.1 from [Pinus taeda](#)
- AFG48694.1 from [Pinus taeda](#)
- AFG48695.1 from [Pinus taeda](#)
- AFG48696.1 from [Pinus taeda](#)
- AFG48697.1 from [Pinus taeda](#)
- AFG48698.1 from [Pinus taeda](#)
- AFG48699.1 from [Pinus taeda](#)
- AFG48700.1 from [Pinus taeda](#)
- AFG48703.1 from [Pinus taeda](#)
- AFG48704.1 from [Pinus taeda](#)
- AFG48706.1 from [Pinus taeda](#)
- AFG48707.1 from [Pinus taeda](#)

Sequence similarity is available as [an NCBI BLAST search of AFG48690.1 against nr](#).

Search parameters

Enzyme: Trypsin: cuts C-term side of KR unless next residue is P.  
Fixed modifications: [Carbamidomethyl \(C\)](#).  
Variable modifications: [Oxidation \(M\)](#).  
Mass values searched: 17  
Mass values matched: 4

Protein sequence coverage: 61%

Matched peptides shown in ***bold red***.

1 EDDAELKAYD **RAAMEEGGGD SVWQRGILMG ERCQPPDFSG IILYDVKGNR**  
51 **VPQLPPGSSE LNIHFASL**

Unformatted sequence string: [68 residues](#) (for pasting into other applications).

Sort by ☒ residue number ☐ increasing mass ☐ decreasing mass  
Show ☒ matched peptides only ☐ predicted peptides also

| Start – End | Observed  | Mr(expt)  | Mr(calc)  | Delta M   | Peptide                                   |
|-------------|-----------|-----------|-----------|-----------|-------------------------------------------|
| 12 – 25     | 1508.6810 | 1507.6737 | 1507.6362 | 0.0376 0  | <b>R.AAMEEGGGDSVWQR.G + Oxidation (M)</b> |
| 12 – 32     | 2249.0529 | 2248.0456 | 2248.0365 | 0.0091 1  | <b>R.AAMEEGGGDSVWQRGILMGER.C</b>          |
| 48 – 68     | 2233.0568 | 2232.0495 | 2232.1651 | -0.1156 1 | <b>K.GNRVPQLPPGSSELNIFHASL.-</b>          |
| 51 – 68     | 1905.9896 | 1904.9823 | 1904.9996 | -0.0173 0 | <b>R.VPQLPPGSSELNIFHASL.-</b>             |

No match to: 842.3678, 870.4180, 876.9173, 1256.6258, 1428.6688, 1495.7463, 1510.6907, 1570.8308, 1707.7269, 1794.8005, 1851.8923, 2211.1045, 2284.1271

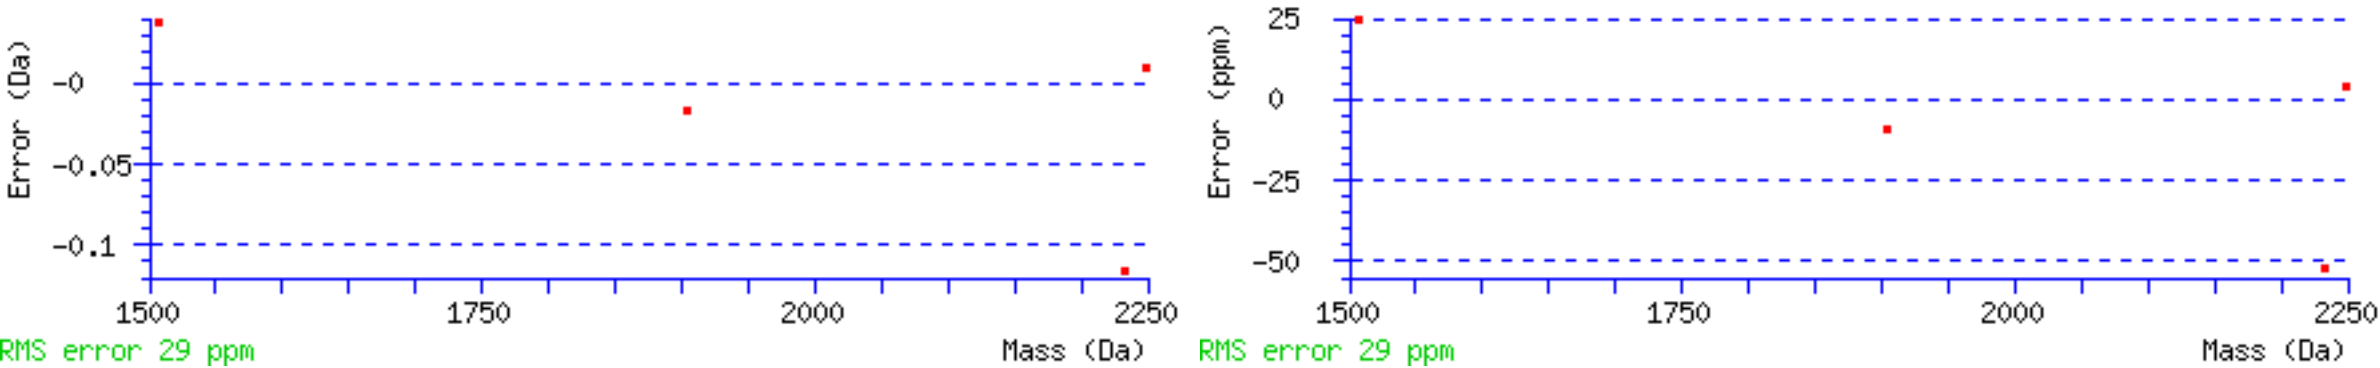

LOCUS AFG48690 68 aa linear PLN 02-APR-2012  
DEFINITION hypothetical protein CL3131Contig1\_04, partial [Pinus taeda].  
ACCESSION AFG48690  
VERSION AFG48690.1  
DBSOURCE accession FJ135545.1  
KEYWORDS .  
SOURCE Pinus taeda (loblolly pine)  
ORGANISM Pinus taeda  
Eukaryota; Viridiplantae; Streptophyta; Embryophyta; Tracheophyta;  
Spermatophyta; Pinidae; Pinales; Pinaceae; Pinus; Pinus.  
REFERENCE 1 (residues 1 to 68)  
AUTHORS Neale,D.B., Wegrzyn,J.L., Lee,J.M., Eckert,A.J., Liechty,J.D.,  
Stevens,K.A. and Langley,C.H.  
TITLE Nucleotide Diversity and Divergence in the Loblolly Pine Gene Space  
JOURNAL Unpublished  
REFERENCE 2 (residues 1 to 68)  
AUTHORS Neale,D.B., Wegrzyn,J.L., Lee,J.M., Eckert,A.J., Liechty,J.D.,  
Stevens,K.A. and Langley,C.H.  
TITLE Direct Submission  
JOURNAL Submitted (12-AUG-2008) Department of Plant Sciences, University of  
California, Davis, One Shields Avenue, Davis, CA 95616, USA  
COMMENT Method: conceptual translation.  
FEATURES  
source Location/Qualifiers  
1..68  
/organism="Pinus taeda"  
/isolate="6888"  
/db\_xref="taxon:3352"  
/tissue\_type="megagametophyte"  
/note="tree id = P.t.10"  
Protein <1..>68  
/product="hypothetical protein"  
CDS 1..68  
/locus\_tag="CL3131Contig1\_04"  
/coded\_by="FJ135545.1:<1..>207"  
/note="Similar to XP\_002314888.1 [Populus trichocarpa]"  
/codon\_start=3
