# Supplementary material for: Effects of Germination on Protein, γ-Aminobutyric Acid, Phenolic Acids, and Antioxidant Capacity in Wheat
Source: MDPI journal article supplement (doi:10.3390/molecules23092244), 2018-09-03
Supplement: s1 [file s1]

Protein View: CAI84642.1

alpha-amylase inhibitor 0.19, partial [Triticum aestivum]

Database: NCBIprot  
Score: 96  
Expect: 0.0014  
Monoisotopic mass (M<sub>r</sub>): 13340  
Calculated pI: 6.86  
Taxonomy: [Triticum aestivum](#)

Sequence similarity is available as [an NCBI BLAST search of CAI84642.1 against nr](#).

Search parameters

Enzyme: Trypsin: cuts C-term side of KR unless next residue is P.  
Fixed modifications: [Carbamidomethyl \(C\)](#)  
Variable modifications: [Oxidation \(M\)](#)  
Mass values searched: 16  
Mass values matched: 6

Protein sequence coverage: 55%

Matched peptides shown in ***bold red***.

1 CYPGQAFQVP ALPACRPLL**R LQCNGSQVPE AVLR**DCCQQL AHISEWCRCG  
51 **ALYSMLDSMY KEHGAQEGQA** GTGAFFRCRR **EVVKLTAASI TAVCRLPIVV**  
101 **DASGDGAYVC KDVAAYPDA**

Unformatted sequence string: [119 residues](#) (for pasting into other applications).

Sort by ☒ residue number ☐ increasing mass ☐ decreasing mass  
Show ☒ matched peptides only ☐ predicted peptides also

| Start – End | Observed  | Mr (expt) | Mr (calc) | Delta M   | Peptide                             |
|-------------|-----------|-----------|-----------|-----------|-------------------------------------|
| 21 – 34     | 1570.7589 | 1569.7516 | 1569.7933 | -0.0417 0 | <b>R.LQCNGSQVPEAVLR.D</b>           |
| 49 – 61     | 1538.7955 | 1537.7883 | 1537.6615 | 0.1268 0  | <b>R.CGALYSMLDSMYK.E</b>            |
| 81 – 95     | 1617.8523 | 1616.8451 | 1616.8920 | -0.0469 1 | <b>R.EVVKLTAASITAVCR.L</b>          |
| 85 – 95     | 1162.5466 | 1161.5393 | 1161.6176 | -0.0783 0 | <b>K.LTAASITAVCR.L</b>              |
| 96 – 111    | 1663.8108 | 1662.8035 | 1662.8287 | -0.0252 0 | <b>R.LPIVVDASGDGAYVCK.D</b>         |
| 96 – 119    | 2466.1834 | 2465.1761 | 2465.1785 | -0.0024 1 | <b>R.LPIVVDASGDGAYVCKDVAAYPDA.-</b> |

No match to: 1318.6418, 1372.6236, 1698.8804, 1727.8098, 1766.7635, 1905.9499, 2055.9716, 2211.1040, 2345.1543, 2753.4137

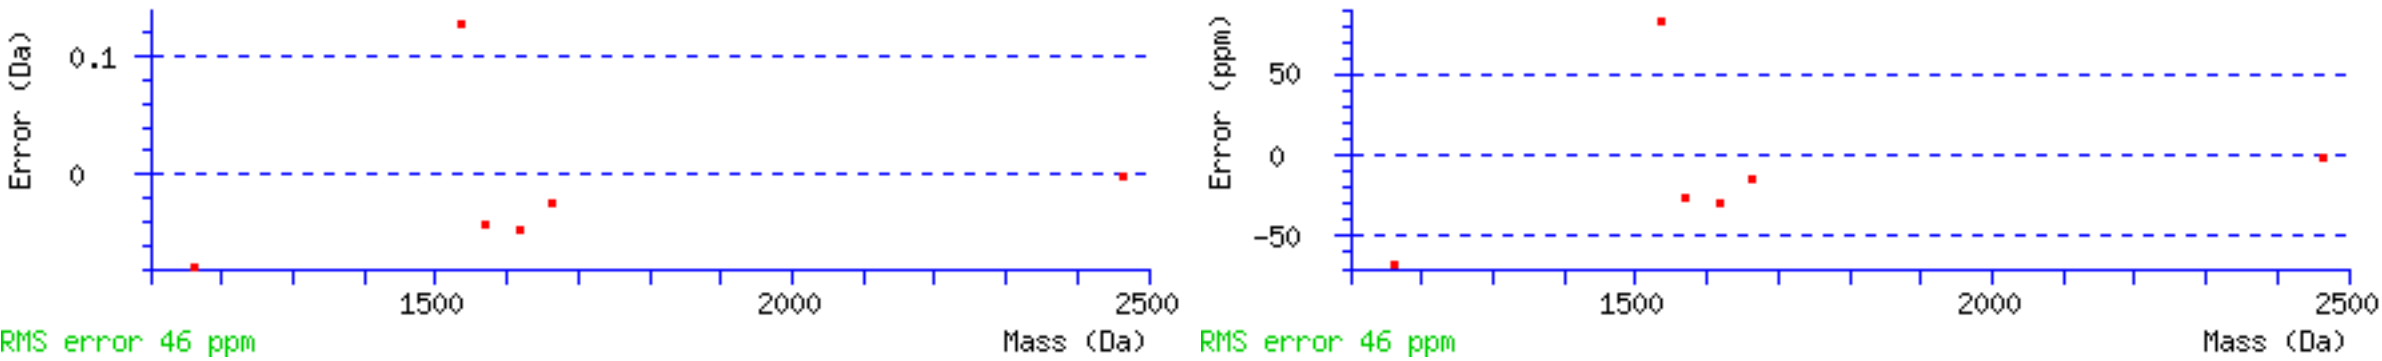

|            |                                                                                                                                                                                                                                                                                                                                                                     |        |        |                 |
|------------|---------------------------------------------------------------------------------------------------------------------------------------------------------------------------------------------------------------------------------------------------------------------------------------------------------------------------------------------------------------------|--------|--------|-----------------|
| LOCUS      | CAI84642                                                                                                                                                                                                                                                                                                                                                            | 119 aa | linear | PLN 26-JUL-2016 |
| DEFINITION | alpha-amylase inhibitor 0.19, partial [Triticum aestivum].                                                                                                                                                                                                                                                                                                          |        |        |                 |
| ACCESSION  | CAI84642                                                                                                                                                                                                                                                                                                                                                            |        |        |                 |
| VERSION    | CAI84642.1                                                                                                                                                                                                                                                                                                                                                          |        |        |                 |
| DBSOURCE   | embl accession AJ966333.1                                                                                                                                                                                                                                                                                                                                           |        |        |                 |
| KEYWORDS   | .                                                                                                                                                                                                                                                                                                                                                                   |        |        |                 |
| SOURCE     | Triticum aestivum (bread wheat)                                                                                                                                                                                                                                                                                                                                     |        |        |                 |
| ORGANISM   | Triticum aestivum                                                                                                                                                                                                                                                                                                                                                   |        |        |                 |
|            | Eukaryota; Viridiplantae; Streptophyta; Embryophyta; Tracheophyta; Spermatophyta; Magnoliophyta; Liliopsida; Poales; Poaceae; BOP clade; Pooideae; Triticodae; Triticeae; Triticinae; Triticum.                                                                                                                                                                     |        |        |                 |
| REFERENCE  | 1                                                                                                                                                                                                                                                                                                                                                                   |        |        |                 |
| AUTHORS    | Weichel,M., Vergoossen,N., Bonomi,S., Ballmer-Weber,B., Pastorello,E.A. and Crameri,R.                                                                                                                                                                                                                                                                              |        |        |                 |
| TITLE      | Cloning cDNA repertoires of IgE-binding proteins of wheat and corn screened with sera from food allergic patients that had undergone DBPCFC                                                                                                                                                                                                                         |        |        |                 |
| JOURNAL    | Unpublished                                                                                                                                                                                                                                                                                                                                                         |        |        |                 |
| REFERENCE  | 2 (residues 1 to 119)                                                                                                                                                                                                                                                                                                                                               |        |        |                 |
| AUTHORS    | Weichel,M.                                                                                                                                                                                                                                                                                                                                                          |        |        |                 |
| TITLE      | Direct Submission                                                                                                                                                                                                                                                                                                                                                   |        |        |                 |
| JOURNAL    | Submitted (21-APR-2005) Weichel M., Molecular Allergology, SIAF, Obere Str. 22, CH-7270 Davos Platz, SWITZERLAND                                                                                                                                                                                                                                                    |        |        |                 |
| FEATURES   | Location/Qualifiers                                                                                                                                                                                                                                                                                                                                                 |        |        |                 |
| source     | 1..119<br>/organism="Triticum aestivum"<br>/cultivar="Wyuna"<br>/db_xref="taxon:4565"<br>/tissue_type="endosperm"                                                                                                                                                                                                                                                   |        |        |                 |
| Protein    | <1..119<br>/product="alpha-amylase inhibitor 0.19"                                                                                                                                                                                                                                                                                                                  |        |        |                 |
| Region     | 1..98<br>/region_name="AAI SS"<br>/note="AAI SS: Alpha-Amylase Inhibitors (AAIs) and Seed Storage (SS) Protein subfamily; composed of cereal-type AAIs and SS proteins. They are mainly present in the seeds of a variety of plants. AAIs play an important role in the natural defenses of plants...; cd00261"<br>/db_xref="CDD:238163"                            |        |        |                 |
| Site       | order(33,85,89,95)<br>/site_type="other"<br>/note="dimer interface [polypeptide binding]"<br>/db_xref="CDD:238163"                                                                                                                                                                                                                                                  |        |        |                 |
| CDS        | 1..119<br>/gene="0.19"<br>/coded_by="AJ966333.1:<1..360"<br>/experiment="experimental evidence, no additional details recorded"<br>/db_xref="GOA:Q4W0V7"<br>/db_xref="InterPro:IPR003612"<br>/db_xref="InterPro:IPR006105"<br>/db_xref="InterPro:IPR006106"<br>/db_xref="InterPro:IPR013771"<br>/db_xref="InterPro:IPR016140"<br>/db_xref="UniProtKB/TrEMBL:Q4W0V7" |        |        |                 |
