# Supplementary material for: Effects of Germination on Protein, γ-Aminobutyric Acid, Phenolic Acids, and Antioxidant Capacity in Wheat
Source: MDPI journal article supplement (doi:10.3390/molecules23092244), 2018-09-03
Supplement: s1 [file s1]

Protein View: XP\_022027330.1

phospholipase SGR2 isoform X2 [Helianthus annuus]

|                                      |                                   |
|--------------------------------------|-----------------------------------|
| Database:                            | NCBIprot                          |
| Score:                               | 86                                |
| Expect:                              | 0.013                             |
| Monoisotopic mass (M <sub>r</sub> ): | 100862                            |
| Calculated pI:                       | 5.35                              |
| Taxonomy:                            | <a href="#">Helianthus annuus</a> |

This protein sequence matches the following other entries:

- XP\_022027331.1 from [Helianthus annuus](#)

Sequence similarity is available as [an NCBI BLAST search of XP\\_022027330.1 against nr](#).

Search parameters

|                         |                                                           |
|-------------------------|-----------------------------------------------------------|
| Enzyme:                 | Trypsin: cuts C-term side of KR unless next residue is P. |
| Fixed modifications:    | <a href="#">Carbamidomethyl (C)</a>                       |
| Variable modifications: | <a href="#">Oxidation (M)</a>                             |
| Mass values searched:   | 22                                                        |
| Mass values matched:    | 11                                                        |

Protein sequence coverage: 17%

Matched peptides shown in **bold red**.

|     |                     |                    |                    |                    |                     |
|-----|---------------------|--------------------|--------------------|--------------------|---------------------|
| 1   | MAESSGKREM          | ATSADMLRNT         | PSNIRR <b>LADE</b> | <b>IQQCEGR</b> QKY | LAQTRSPSDG          |
| 51  | GDVRWYFSKI          | PMAENELAAA         | IPPTENVVGKG        | DYFRFGMRDS         | LAIEASFLQR          |
| 101 | EEELLSNWWR          | EYGECSVGPK         | GSLSSISESN         | DSPNAQSSKL         | YANEEEERVGV         |
| 151 | PVKGGLYEVD          | LLRRHSFPVY         | WSGDNRRVLR         | GHWFARKGSL         | DWFPLREDVA          |
| 201 | EQLEFAYRSR          | IWHRRTFQPS         | GLFAARVDMQ         | GSSPGLHALF         | TGEDDTWDAW          |
| 251 | LNIPSSGFSG          | VVNFGGTGLK         | LRR <b>GYAPSHS</b> | <b>PKPTQDEL</b> RQ | <b>Q</b> KEEEMDDYC  |
| 301 | SQVPVR <b>HLVF</b>  | <b>MVHGIGQR</b> LQ | KANLVDDVGT         | FRLVTQNLAD         | LHLTSYQRGT          |
| 351 | QR <b>VLFIP</b> CQW | <b>R</b> NLKLSGES  | AVEKCTLPGV         | RGLRITLSAT         | VHDLVYYMSP          |
| 401 | IYCQDIIDSV          | SNQLNRLYMK         | FLKRNPGYDG         | KVSLYGHSLG         | SVLSYDILCH          |
| 451 | QETLSSPFPM          | EWMYTDQTHE         | VSPERNSSVN         | SPENDLVTNN         | EGMDTVASHT          |
| 501 | EGVNGKLSIA          | TDSEK <b>DDSLV</b> | <b>LDEVVVK</b> SGD | DPIEMQSENN         | EVLTSDDSSQV         |
| 551 | DEEINENDES          | VVIKSLKEEI         | DCLNARV <b>REL</b> | <b>ESQIAEGTNS</b>  | <b>G</b> TRANKQETS  |
| 601 | TSRNESVSES          | FPSSKNDSRK         | SYTPYIKYTK         | LLFK <b>VDTFFA</b> | <b>VGSPLGVFLA</b>   |
| 651 | <b>L</b> RNVRIIGIK  | GKDYWEDENI         | IEEMPCCRQM         | FNVFHPHDPV         | AYRVEPLVSK          |
| 701 | EYIDKRFPVII         | PYHRGGKRLH         | VTYQEFVEGV         | ASR <b>SQVVVDK</b> | <b>MSVAK</b> VKVLVT |
| 751 | ICQSRDND DH         | EETSEEP EEI        | ERSYGSRMLE         | <b>RLTGSQDGRV</b>  | <b>DHVLQNKTFE</b>   |
| 801 | <b>HQYISAVGAH</b>   | <b>TKYWR</b> DCDTA | LFILK <b>HLYRD</b> | <b>IPNEPK</b> TSSE | DTLSQENADW          |
| 851 | EELFDNEQLP          | LTFASEKFMK         | QLSVRVKKFA         | NQ                 |                     |

Unformatted sequence string: [882 residues](#) (for pasting into other applications).

Sort by ☒ residue number ☐ increasing mass ☐ decreasing mass  
Show ☒ matched peptides only ☐ predicted peptides also

| Start – End | Observed  | Mr (expt) | Mr (calc) | Delta   | M | Peptide                                   |
|-------------|-----------|-----------|-----------|---------|---|-------------------------------------------|
| 27 – 37     | 1318.6559 | 1317.6486 | 1317.5983 | 0.0503  | 0 | R.LADE <b>IQQCEGR</b> .Q                  |
| 274 – 292   | 2167.0344 | 2166.0272 | 2166.0818 | -0.0546 | 1 | R.GYAPSHS <b>PKPTQDEL</b> RQ <b>QK</b> .E |
| 307 – 318   | 1393.6438 | 1392.6365 | 1392.7449 | -0.1084 | 0 | R.HLVFM <b>MVHGIGQR</b> .L                |
| 353 – 362   | 1346.6529 | 1345.6456 | 1345.7329 | -0.0873 | 1 | R.V <b>LFI</b> PCQ <b>WRK</b> .N          |
| 516 – 527   | 1330.6485 | 1329.6412 | 1329.7028 | -0.0616 | 0 | K.DDSLVL <b>DEVVVK</b> .S                 |
| 579 – 593   | 1591.7866 | 1590.7793 | 1590.7485 | 0.0308  | 0 | R.E <b>LESQIAEGTNS</b> G <b>TR</b> .A     |
| 635 – 652   | 1908.8997 | 1907.8925 | 1908.0509 | -0.1585 | 0 | K.VDTFFAV <b>GSPLGVFLALR</b> .N           |
| 734 – 745   | 1306.5803 | 1305.5731 | 1305.6962 | -0.1232 | 1 | R.SQVVVDK <b>MSVAK</b> .V + Oxidation (M) |
| 782 – 797   | 1766.7578 | 1765.7505 | 1765.9071 | -0.1566 | 1 | R.LTGSQDGRVD <b>HVLQNK</b> .T             |
| 798 – 815   | 2194.0504 | 2193.0431 | 2193.0756 | -0.0325 | 1 | K.TFE <b>HQYISAVGAH</b> TKYWR.D           |
| 826 – 836   | 1381.6547 | 1380.6475 | 1380.7150 | -0.0675 | 1 | K.HLYRD <b>IPNEPK</b> .T                  |

No match to: 870.4201, 1014.4370, 1261.5736, 1276.6542, 1326.6287, 1608.8216, 1646.7789, 2062.8520, 2077.9626, 2162.0488, 2211.1040

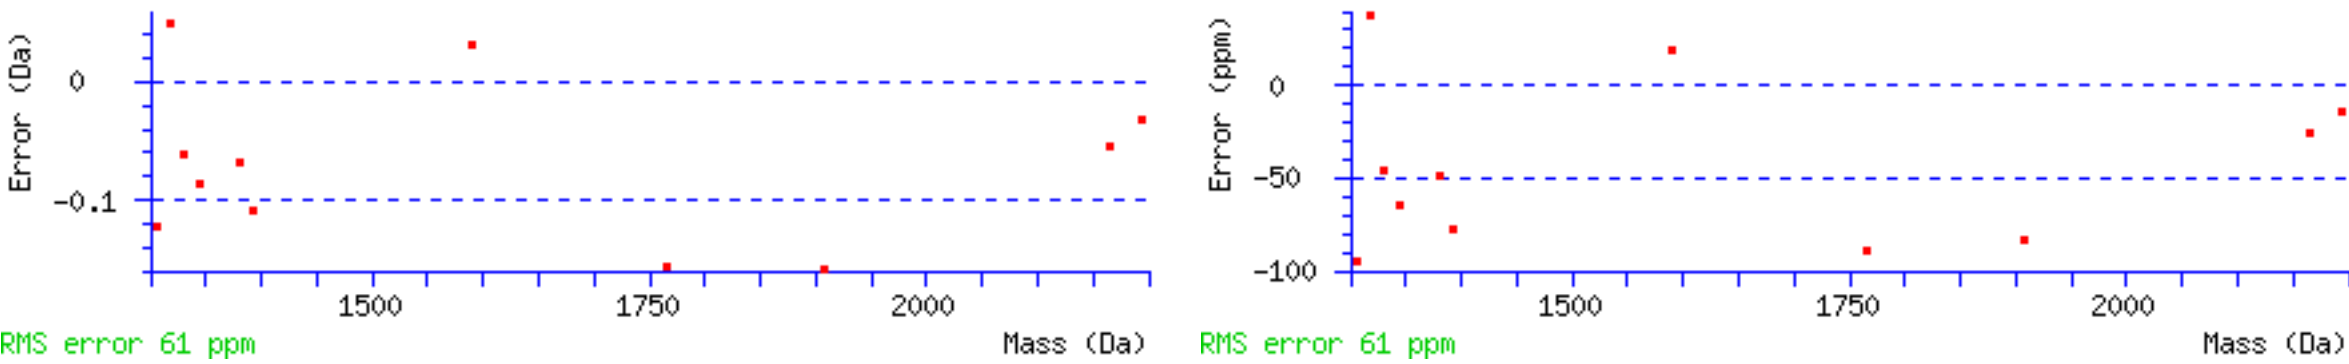

|            |                                                                                                                                                                                                                                                                                                                                                                                                                                                                                                                                                                                                                                                                                                                                                   |        |        |                 |
|------------|---------------------------------------------------------------------------------------------------------------------------------------------------------------------------------------------------------------------------------------------------------------------------------------------------------------------------------------------------------------------------------------------------------------------------------------------------------------------------------------------------------------------------------------------------------------------------------------------------------------------------------------------------------------------------------------------------------------------------------------------------|--------|--------|-----------------|
| LOCUS      | XP_022027330                                                                                                                                                                                                                                                                                                                                                                                                                                                                                                                                                                                                                                                                                                                                      | 882 aa | linear | PLN 07-AUG-2017 |
| DEFINITION | phospholipase SGR2 isoform X2 [Helianthus annuus].                                                                                                                                                                                                                                                                                                                                                                                                                                                                                                                                                                                                                                                                                                |        |        |                 |
| ACCESSION  | XP_022027330                                                                                                                                                                                                                                                                                                                                                                                                                                                                                                                                                                                                                                                                                                                                      |        |        |                 |
| VERSION    | XP_022027330.1                                                                                                                                                                                                                                                                                                                                                                                                                                                                                                                                                                                                                                                                                                                                    |        |        |                 |
| DBLINK     | BioProject: PRJNA396063                                                                                                                                                                                                                                                                                                                                                                                                                                                                                                                                                                                                                                                                                                                           |        |        |                 |
| DBSOURCE   | REFSEQ: accession XM_022171638.1                                                                                                                                                                                                                                                                                                                                                                                                                                                                                                                                                                                                                                                                                                                  |        |        |                 |
| KEYWORDS   | RefSeq.                                                                                                                                                                                                                                                                                                                                                                                                                                                                                                                                                                                                                                                                                                                                           |        |        |                 |
| SOURCE     | Helianthus annuus (common sunflower)                                                                                                                                                                                                                                                                                                                                                                                                                                                                                                                                                                                                                                                                                                              |        |        |                 |
| ORGANISM   | Helianthus annuus                                                                                                                                                                                                                                                                                                                                                                                                                                                                                                                                                                                                                                                                                                                                 |        |        |                 |
|            | Eukaryota; Viridiplantae; Streptophyta; Embryophyta; Tracheophyta; Spermatophyta; Magnoliophyta; eudicotyledons; Gunneridae; Pentapetalae; asterids; campanulids; Asterales; Asteraceae; Asteroideae; Heliantheae alliance; Heliantheae; Helianthus.                                                                                                                                                                                                                                                                                                                                                                                                                                                                                              |        |        |                 |
| COMMENT    | MODEL REFSEQ: This record is predicted by automated computational analysis. This record is derived from a genomic sequence (NC_035435.1) annotated using gene prediction method: Gnomon, supported by EST evidence.<br>Also see:<br>Documentation of NCBI's Annotation Process<br><br>##Genome-Annotation-Data-START##<br>Annotation Provider :: NCBI<br>Annotation Status :: Full annotation<br>Annotation Version :: Helianthus annuus Annotation Release 100<br><br>Annotation Pipeline :: NCBI eukaryotic genome annotation pipeline<br>Annotation Software Version :: 7.4<br>Annotation Method :: Best-placed RefSeq; Gnomon<br>Features Annotated :: Gene; mRNA; CDS; ncRNA<br>##Genome-Annotation-Data-END##<br>COMPLETENESS: full length. |        |        |                 |
| FEATURES   | Location/Qualifiers                                                                                                                                                                                                                                                                                                                                                                                                                                                                                                                                                                                                                                                                                                                               |        |        |                 |
| source     | 1..882<br>/organism="Helianthus annuus"<br>/specimen_voucher="SF193"<br>/db_xref="taxon:4232"<br>/tissue_type="leaves"<br>/dev_stage="4 leaves"<br>/country="France"<br>/collected_by="INRA, LIPM"<br>/linkage_group="3"<br>/genotype="XRQ/B"                                                                                                                                                                                                                                                                                                                                                                                                                                                                                                     |        |        |                 |
| Protein    | 1..882<br>/product="phospholipase SGR2 isoform X2"<br>/calculated_mol_wt=100109                                                                                                                                                                                                                                                                                                                                                                                                                                                                                                                                                                                                                                                                   |        |        |                 |
| Region     | 535..>586<br>/region_name="GrpE"<br>/note="nucleotide exchange factor GrpE; c103075"<br>/db_xref="CDD:322182"                                                                                                                                                                                                                                                                                                                                                                                                                                                                                                                                                                                                                                     |        |        |                 |
| Region     | 634..828<br>/region_name="DDHD"<br>/note="DDHD domain; pfam02862"<br>/db_xref="CDD:308481"                                                                                                                                                                                                                                                                                                                                                                                                                                                                                                                                                                                                                                                        |        |        |                 |
| CDS        | 1..882<br>/gene="LOC110928610"<br>/coded_by="XM_022171638.1:762..3410"<br>/db_xref="GeneID:110928610"                                                                                                                                                                                                                                                                                                                                                                                                                                                                                                                                                                                                                                             |        |        |                 |
