# Supplementary material for: Effects of Germination on Protein, γ-Aminobutyric Acid, Phenolic Acids, and Antioxidant Capacity in Wheat
Source: MDPI journal article supplement (doi:10.3390/molecules23092244), 2018-09-03
Supplement: s1 [file s1]

Protein View: AFC75531.1

granule bound starch synthase, partial [Triticum spelta]

Database: NCBIprot  
Score: 399  
Expect: 7.3e-34  
Monoisotopic mass (M<sub>r</sub>): 64252  
Calculated pI: 8.61  
Taxonomy: [Triticum spelta](#)

Sequence similarity is available as [an NCBI BLAST search of AFC75531.1 against nr](#).

Search parameters

Enzyme: Trypsin: cuts C-term side of KR unless next residue is P.  
Fixed modifications: [Carbamidomethyl \(C\)](#)  
Variable modifications: [Oxidation \(M\)](#)  
Mass values searched: 43  
Mass values matched: 37

Protein sequence coverage: 55%

Matched peptides shown in **bold red**.

```

1  MAALVTSQLA  TSGTVLGITD  RFRRAGFQGV  RPRSPADAAL  GMRTVGASAA
51  PTQSRKAHRG  TRRCLSMVVR  ATGSGGMNLV  FVGAEMAPWS  KTGGLGDVLG
101 GLPPAMAANG  HRVMVISPRY  DQYKDAWDTs  VVSEIKVVVK  YERVRYFHCY
151 KRGVDRVFVD  HPCFLEKVRG  KTKEKIYGPD  AGTDYEDNQQ  RFSLLCQAAL
201 EVPRILNLDN  NPYFSGPYED  VVFCNDWHT  GLLACYLKSN  YQSNGIYRAA
251 KVAFCIHNIS  YQGRFSDDF  AQLNLPDRFK  SSFDFIDGYD  KPVEGRKINW
301 MKAGILQADK  VLTVPSPYAE  ELISGEARGC  ELDNIMRLTG  ITGIVNGMDV
351 SEWDPTKDKF  LAVNYDITTA  LEGKALNKEA  LQAEVGLPVD  RKVPLVAFIG
401 RLEEQKGPDV  MIAAIPEILK  EEDVQIVLLG  TGKKKFERLL  KSIEEKFPSK
451 VRAVVRFNAP  LAHQMMAGAD  VLAVTSRFEP  CGLIQLQGMR  YGTPCACAST
501 GGLVDTIVEG  KTGFHMGRLS  VDCNVVEPAD  VKKVVTTLKR  AVKVVGTPAY
551 HEMVKNCMIQ  DLSWKGPAKN  WEDVLL
```

Unformatted sequence string: [576 residues](#) (for pasting into other applications).

Sort by ☒ residue number ☐ increasing mass ☐ decreasing mass  
Show ☒ matched peptides only ☐ predicted peptides also

| Start – End | Observed  | Mr (expt) | Mr (calc) | Delta M   | Peptide                                                           |
|-------------|-----------|-----------|-----------|-----------|-------------------------------------------------------------------|
| 71 – 91     | 2109.9739 | 2108.9666 | 2109.0023 | -0.0357 0 | <b>R.ATGSGGMNLV</b> <b>FVGAEMAPWSK.T</b>                          |
| 71 – 91     | 2125.9971 | 2124.9898 | 2124.9973 | -0.0075 0 | <b>R.ATGSGGMNLV</b> <b>FVGAEMAPWSK.T</b> + Oxidation (M)          |
| 92 – 112    | 1976.9737 | 1975.9664 | 1975.9898 | -0.0234 0 | <b>K.TGGLGDVLG</b> <b>GLPPAMAANGHR.V</b> + Oxidation (M)          |
| 113 – 119   | 801.3313  | 800.3240  | 800.4578  | -0.1338 0 | <b>R.VMVISPR.Y</b>                                                |
| 120 – 136   | 2046.9584 | 2045.9511 | 2045.9582 | -0.0071 1 | <b>R.YDQYKDAWDT</b> <b>SVVSEIK.V</b>                              |
| 144 – 151   | 1172.5121 | 1171.5048 | 1171.5597 | -0.0549 1 | <b>R.VRYFHCYK.R</b>                                               |
| 146 – 151   | 917.2917  | 916.2844  | 916.3902  | -0.1057 0 | <b>R.YFHCYK.R</b>                                                 |
| 146 – 152   | 1073.4323 | 1072.4250 | 1072.4913 | -0.0663 1 | <b>R.YFHCYKR.G</b>                                                |
| 153 – 167   | 1817.8849 | 1816.8776 | 1816.8931 | -0.0154 1 | <b>R.GVDRV</b> <b>FVDHPCFLEK.V</b>                                |
| 157 – 167   | 1390.6532 | 1389.6459 | 1389.6751 | -0.0292 0 | <b>R.VFVDHPCFLEK.V</b>                                            |
| 157 – 169   | 1645.8496 | 1644.8423 | 1644.8447 | -0.0023 1 | <b>R.VFVDHPCFLEKVR.G</b>                                          |
| 174 – 191   | 2098.9956 | 2097.9884 | 2097.9239 | 0.0645 1  | <b>K.EKIYGP</b> <b>DAGTDYEDNQQR.F</b>                             |
| 176 – 191   | 1841.7834 | 1840.7761 | 1840.7864 | -0.0103 0 | <b>K.IYGP</b> <b>DAGTDYEDNQQR.F</b>                               |
| 239 – 248   | 1201.5049 | 1200.4976 | 1200.5523 | -0.0547 0 | <b>K.SNYQ</b> <b>SNGIYR.A</b>                                     |
| 239 – 251   | 1471.7928 | 1470.7856 | 1470.7215 | 0.0641 1  | <b>K.SNYQ</b> <b>SNGIYRAAK.V</b>                                  |
| 265 – 278   | 1684.7812 | 1683.7739 | 1683.7893 | -0.0154 0 | <b>R.FS</b> <b>DDFAQLNL</b> <b>PD</b> R.F                         |
| 265 – 280   | 1959.9585 | 1958.9513 | 1958.9527 | -0.0014 1 | <b>R.FS</b> <b>DDFAQLNL</b> <b>PD</b> RFK.S                       |
| 279 – 296   | 2106.9959 | 2105.9886 | 2106.0058 | -0.0172 1 | <b>R.FK</b> <b>SS</b> <b>FD</b> <b>FID</b> <b>GYDKP</b> VEGR.K    |
| 281 – 296   | 1831.8337 | 1830.8264 | 1830.8425 | -0.0161 0 | <b>K.SS</b> <b>FD</b> <b>FID</b> <b>GYDKP</b> VEGR.K              |
| 298 – 310   | 1503.7733 | 1502.7660 | 1502.7915 | -0.0255 1 | <b>K.INWMKAGILQADK.V</b> + Oxidation (M)                          |
| 311 – 328   | 1997.0123 | 1996.0051 | 1996.0153 | -0.0102 0 | <b>K.VLTVPSPYAE</b> <b>ELISGEAR.G</b>                             |
| 329 – 337   | 1107.4274 | 1106.4202 | 1106.4848 | -0.0647 0 | <b>R.GCELDNIMR.L</b>                                              |
| 375 – 391   | 1822.9875 | 1821.9802 | 1821.9948 | -0.0146 1 | <b>K.ALNKEALQAEVGLP</b> <b>VDR.K</b>                              |
| 379 – 391   | 1396.7055 | 1395.6982 | 1395.7358 | -0.0376 0 | <b>K.EALQAEVGLP</b> <b>VDR.K</b>                                  |
| 392 – 401   | 1099.6348 | 1098.6275 | 1098.6913 | -0.0638 1 | <b>R.KVPLVAFIGR.L</b>                                             |
| 393 – 401   | 971.5152  | 970.5079  | 970.5964  | -0.0885 0 | <b>K.VPLVAFIGR.L</b>                                              |
| 457 – 477   | 2200.0641 | 2199.0568 | 2199.0929 | -0.0360 0 | <b>R.FNAPLAHQMMAGAD</b> <b>VLA</b> VT <b>SR.F</b>                 |
| 457 – 477   | 2216.0657 | 2215.0584 | 2215.0878 | -0.0293 0 | <b>R.FNAPLAHQMMAGAD</b> <b>VLA</b> VT <b>SR.F</b> + Oxidation (M) |
| 478 – 490   | 1548.7453 | 1547.7381 | 1547.7588 | -0.0208 0 | <b>R.FEPCGLIQLQGMR.Y</b>                                          |
| 478 – 490   | 1564.7453 | 1563.7380 | 1563.7538 | -0.0158 0 | <b>R.FEPCGLIQLQGMR.Y</b> + Oxidation (M)                          |
| 491 – 511   | 2156.0014 | 2154.9941 | 2154.9926 | 0.0015 0  | <b>R.YGTPCACA</b> ST <b>GGLVD</b> TIVEGK.T                        |
| 512 – 518   | 805.2412  | 804.2339  | 804.3701  | -0.1362 0 | <b>K.TGFHMGR.L</b>                                                |
| 512 – 518   | 821.2493  | 820.2420  | 820.3650  | -0.1230 0 | <b>K.TGFHMGR.L</b> + Oxidation (M)                                |
| 519 – 533   | 1672.8402 | 1671.8329 | 1671.8502 | -0.0172 1 | <b>R.LS</b> <b>VD</b> <b>CNV</b> VEPAD <b>VKK.V</b>               |
| 534 – 540   | 816.3950  | 815.3877  | 815.5229  | -0.1352 1 | <b>K.VV</b> TT <b>LKR.A</b>                                       |
| 544 – 555   | 1330.6479 | 1329.6406 | 1329.6751 | -0.0345 0 | <b>K.VVGT</b> <b>PAYHEMVK.N</b>                                   |
| 544 – 555   | 1346.6577 | 1345.6505 | 1345.6700 | -0.0196 0 | <b>K.VVGT</b> <b>PAYHEMVK.N</b> + Oxidation (M)                   |

No match to: 1319.6901, 1326.6402, 1412.7463, 1430.7624, 1446.7509, 2211.1040

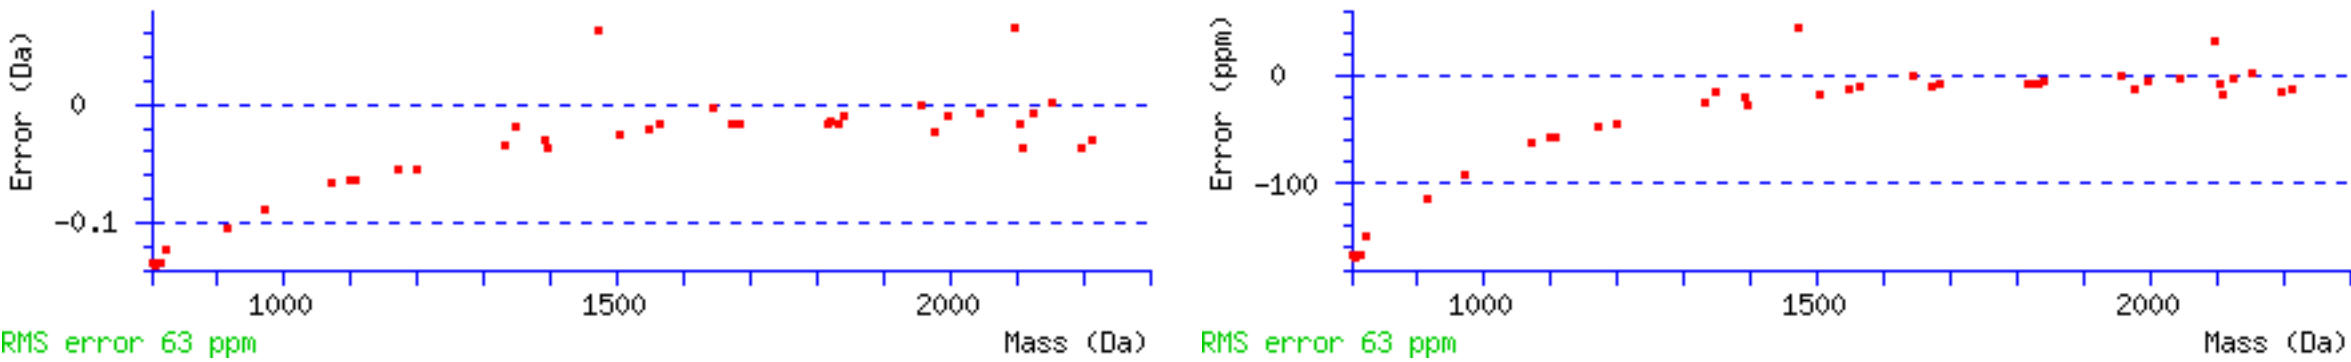

|            |                                                                                                                                                                                                                                                                                |        |        |                 |
|------------|--------------------------------------------------------------------------------------------------------------------------------------------------------------------------------------------------------------------------------------------------------------------------------|--------|--------|-----------------|
| LOCUS      | AFC75531                                                                                                                                                                                                                                                                       | 576 aa | linear | PLN 06-MAR-2012 |
| DEFINITION | granule bound starch synthase, partial [Triticum spelta].                                                                                                                                                                                                                      |        |        |                 |
| ACCESSION  | AFC75531                                                                                                                                                                                                                                                                       |        |        |                 |
| VERSION    | AFC75531.1                                                                                                                                                                                                                                                                     |        |        |                 |
| DBSOURCE   | accession JN935594.1                                                                                                                                                                                                                                                           |        |        |                 |
| KEYWORDS   | .                                                                                                                                                                                                                                                                              |        |        |                 |
| SOURCE     | Triticum spelta                                                                                                                                                                                                                                                                |        |        |                 |
| ORGANISM   | Triticum spelta                                                                                                                                                                                                                                                                |        |        |                 |
|            | Eukaryota; Viridiplantae; Streptophyta; Embryophyta; Tracheophyta; Spermatophyta; Magnoliophyta; Liliopsida; Poales; Poaceae; BOP clade; Pooideae; Triticeae; Triticeae; Triticeae; Triticum.                                                                                  |        |        |                 |
| REFERENCE  | 1 (residues 1 to 576)                                                                                                                                                                                                                                                          |        |        |                 |
| AUTHORS    | Guzman,C., Leonor,C., Martin,L.M. and Alvarez,J.B.                                                                                                                                                                                                                             |        |        |                 |
| TITLE      | Comparative analysis of the waxy genes present in Spanish spelt wheat with their homologous genes in polyploid wheat and relatives                                                                                                                                             |        |        |                 |
| JOURNAL    | Unpublished                                                                                                                                                                                                                                                                    |        |        |                 |
| REFERENCE  | 2 (residues 1 to 576)                                                                                                                                                                                                                                                          |        |        |                 |
| AUTHORS    | Guzman,C., Leonor,C., Martin,L.M. and Alvarez,J.B.                                                                                                                                                                                                                             |        |        |                 |
| TITLE      | Direct Submission                                                                                                                                                                                                                                                              |        |        |                 |
| JOURNAL    | Submitted (26-OCT-2011) Genetics, University of Cordoba, Edificio C5 Gregor Mendel, Campus de Rabanales, Cordoba 14071, Spain                                                                                                                                                  |        |        |                 |
| FEATURES   | Location/Qualifiers                                                                                                                                                                                                                                                            |        |        |                 |
| source     | 1..576                                                                                                                                                                                                                                                                         |        |        |                 |
|            | /organism="Triticum spelta"                                                                                                                                                                                                                                                    |        |        |                 |
|            | /isolate="D CGN 11460"                                                                                                                                                                                                                                                         |        |        |                 |
|            | /db_xref="taxon:58933"                                                                                                                                                                                                                                                         |        |        |                 |
| Protein    | 1..>576                                                                                                                                                                                                                                                                        |        |        |                 |
|            | /product="granule bound starch synthase"                                                                                                                                                                                                                                       |        |        |                 |
| Region     | 77..575                                                                                                                                                                                                                                                                        |        |        |                 |
|            | /region_name="glgA"                                                                                                                                                                                                                                                            |        |        |                 |
|            | /note="glycogen/starch synthase, ADP-glucose type; TIGR02095"                                                                                                                                                                                                                  |        |        |                 |
|            | /db_xref="CDD:273969"                                                                                                                                                                                                                                                          |        |        |                 |
| Region     | 78..575                                                                                                                                                                                                                                                                        |        |        |                 |
|            | /region_name="GT1 Glycogen synthase_DULL1 like"                                                                                                                                                                                                                                |        |        |                 |
|            | /note="This family is most closely related to the GT1 family of glycosyltransferases. Glycogen synthase catalyzes the formation and elongation of the alpha-1,4-glucose backbone using ADP-glucose, the second and key step of glycogen biosynthesis. This family...; cd03791" |        |        |                 |
|            | /db_xref="CDD:99965"                                                                                                                                                                                                                                                           |        |        |                 |
| Site       | order(91,399..401,456..457,462,479,484)                                                                                                                                                                                                                                        |        |        |                 |
|            | /site_type="other"                                                                                                                                                                                                                                                             |        |        |                 |
|            | /note="ADP-binding pocket [chemical binding]"                                                                                                                                                                                                                                  |        |        |                 |
| Site       | order(320,499,504..505,507,536)                                                                                                                                                                                                                                                |        |        |                 |
|            | /site_type="other"                                                                                                                                                                                                                                                             |        |        |                 |
|            | /note="homodimer interface [polypeptide binding]"                                                                                                                                                                                                                              |        |        |                 |
|            | /db_xref="CDD:99965"                                                                                                                                                                                                                                                           |        |        |                 |
| CDS        | 1..576                                                                                                                                                                                                                                                                         |        |        |                 |
|            | /gene="Waxy"                                                                                                                                                                                                                                                                   |        |        |                 |
|            | /coded_by="join(JN935594.1:32..352,JN935594.1:443..523,JN935594.1:619..717,JN935594.1:822..975,JN935594.1:1131..1228,JN935594.1:1370..1723,JN935594.1:1809..1988,JN935594.1:2071..2262,JN935594.1:2347..2433,JN935594.1:2532..2660,JN935594.1:2777..>2810)"                    |        |        |                 |
