# Supplementary material for: Effects of Germination on Protein, γ-Aminobutyric Acid, Phenolic Acids, and Antioxidant Capacity in Wheat
Source: MDPI journal article supplement (doi:10.3390/molecules23092244), 2018-09-03
Supplement: s1 [file s1]

Protein View: AAV39517.1

0.19 dimeric alpha-amylase inhibitor, partial [Triticum aestivum]

Database: NCBIprot  
Score: 153  
Expect: 2.9e-09  
Monoisotopic mass (M<sub>r</sub>): 13815  
Calculated pI: 5.73  
Taxonomy: [Triticum aestivum](#)

Sequence similarity is available as [an NCBI BLAST search of AAV39517.1 against nr](#).

Search parameters

Enzyme: Trypsin: cuts C-term side of KR unless next residue is P.  
Fixed modifications: [Carbamidomethyl \(C\)](#)  
Variable modifications: [Oxidation \(M\)](#)  
Mass values searched: 12  
Mass values matched: 8

Protein sequence coverage: 92%

Matched peptides shown in ***bold red***.

1 **SGPWMCPGY AFKVPALPGC RPVLKLCNG SQVPEAVLRE CCQQLADISE**  
51 **WCRCGALYSM LDSMYKEHGV QEGQAGTGAF PSCRREVVKL TAASITAVCK**  
101 **LPIVIDASGD GAYVCK**DVAA YPDA

Unformatted sequence string: [124 residues](#) (for pasting into other applications).

Sort by ☒ residue number ☐ increasing mass ☐ decreasing mass  
Show ☒ matched peptides only ☐ predicted peptides also

| Start – End | Observed  | Mr (expt) | Mr (calc) | Delta M   | Peptide                             |
|-------------|-----------|-----------|-----------|-----------|-------------------------------------|
| 1 – 13      | 1563.6278 | 1562.6205 | 1562.6686 | -0.0482 0 | - .SGPWMCPGYAFK.V                   |
| 14 – 25     | 1306.7046 | 1305.6974 | 1305.7591 | -0.0617 0 | K.VPALPGCRPVLK.L                    |
| 26 – 39     | 1570.7657 | 1569.7584 | 1569.7933 | -0.0349 0 | K.LQCNGSQVPEAVLR.E                  |
| 40 – 53     | 1854.7305 | 1853.7233 | 1853.7495 | -0.0262 0 | R.ECCQQLADISEWCR.C                  |
| 54 – 84     | 3407.5660 | 3406.5587 | 3406.4839 | 0.0748 1  | R.CGALYSMLDSMYKEHGVQEGQAGTGAFPSCR.R |
| 86 – 100    | 1589.8383 | 1588.8310 | 1588.8858 | -0.0548 1 | R.EVVKLTAASITAVCK.L                 |
| 90 – 100    | 1134.5255 | 1133.5182 | 1133.6114 | -0.0933 0 | K.LTAASITAVCK.L                     |
| 101 – 116   | 1677.8203 | 1676.8130 | 1676.8444 | -0.0313 0 | K.LPIVIDASGDGAYVCK.D                |

No match to: 870.4032, 1794.7845, 2211.1040, 2827.3047

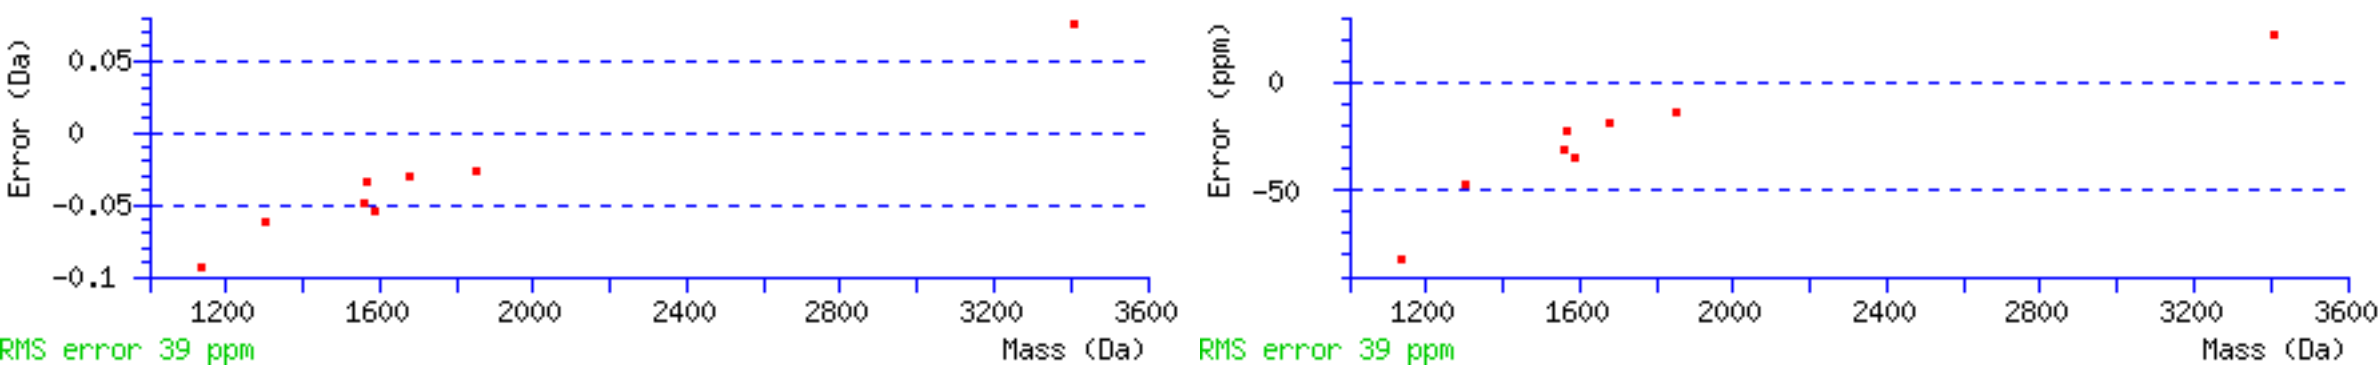

|            |                                                                                                                                                                                                                                                                               |        |        |                 |
|------------|-------------------------------------------------------------------------------------------------------------------------------------------------------------------------------------------------------------------------------------------------------------------------------|--------|--------|-----------------|
| LOCUS      | AAV39517                                                                                                                                                                                                                                                                      | 124 aa | linear | PLN 26-JUL-2016 |
| DEFINITION | 0.19 dimeric alpha-amylase inhibitor, partial [Triticum aestivum].                                                                                                                                                                                                            |        |        |                 |
| ACCESSION  | AAV39517                                                                                                                                                                                                                                                                      |        |        |                 |
| VERSION    | AAV39517.1                                                                                                                                                                                                                                                                    |        |        |                 |
| DBSOURCE   | accession AY729675.1                                                                                                                                                                                                                                                          |        |        |                 |
| KEYWORDS   | .                                                                                                                                                                                                                                                                             |        |        |                 |
| SOURCE     | Triticum aestivum (bread wheat)                                                                                                                                                                                                                                               |        |        |                 |
| ORGANISM   | Triticum aestivum                                                                                                                                                                                                                                                             |        |        |                 |
|            | Eukaryota; Viridiplantae; Streptophyta; Embryophyta; Tracheophyta; Spermatophyta; Magnoliophyta; Liliopsida; Poales; Poaceae; BOP clade; Pooideae; Triticodae; Triticeae; Triticinae; Triticum.                                                                               |        |        |                 |
| REFERENCE  | 1 (residues 1 to 124)                                                                                                                                                                                                                                                         |        |        |                 |
| AUTHORS    | Wang,J.R., Wei,Y.M., Yan,Z.H. and Zheng,Y.L.                                                                                                                                                                                                                                  |        |        |                 |
| TITLE      | Detection of single nucleotide polymorphisms in 24 kDa dimeric alpha-amylase inhibitors from cultivated wheat and its diploid putative progenitors                                                                                                                            |        |        |                 |
| JOURNAL    | Biochim. Biophys. Acta 1723 (1-3), 309-320 (2005)                                                                                                                                                                                                                             |        |        |                 |
| PUBMED     | 15837429                                                                                                                                                                                                                                                                      |        |        |                 |
| REFERENCE  | 2 (residues 1 to 124)                                                                                                                                                                                                                                                         |        |        |                 |
| AUTHORS    | Wang,J., Yan,Z., Wei,Y. and Zheng,Y.                                                                                                                                                                                                                                          |        |        |                 |
| TITLE      | Direct Submission                                                                                                                                                                                                                                                             |        |        |                 |
| JOURNAL    | Submitted (14-AUG-2004) Triticeae Research Institute, Sichuan Agricultural University, Dujiangyan, Si Chuan 611830, China                                                                                                                                                     |        |        |                 |
| COMMENT    | Method: conceptual translation.                                                                                                                                                                                                                                               |        |        |                 |
| FEATURES   | Location/Qualifiers                                                                                                                                                                                                                                                           |        |        |                 |
| source     | 1..124                                                                                                                                                                                                                                                                        |        |        |                 |
|            | /organism="Triticum aestivum"                                                                                                                                                                                                                                                 |        |        |                 |
|            | /cultivar="Chuan Nong 16"                                                                                                                                                                                                                                                     |        |        |                 |
|            | /specimen voucher="CDS1367"                                                                                                                                                                                                                                                   |        |        |                 |
|            | /db_xref="taxon:4565"                                                                                                                                                                                                                                                         |        |        |                 |
| Protein    | <1..124                                                                                                                                                                                                                                                                       |        |        |                 |
|            | /product="0.19 dimeric alpha-amylase inhibitor"                                                                                                                                                                                                                               |        |        |                 |
| Region     | 3..103                                                                                                                                                                                                                                                                        |        |        |                 |
|            | /region name="AAI_SS"                                                                                                                                                                                                                                                         |        |        |                 |
|            | /note="AAI_SS: Alpha-Amylase Inhibitors (AAIs) and Seed Storage (SS) Protein subfamily; composed of cereal-type AAIs and SS proteins. They are mainly present in the seeds of a variety of plants. AAIs play an important role in the natural defenses of plants...; cd00261" |        |        |                 |
|            | /db_xref="CDD:238163"                                                                                                                                                                                                                                                         |        |        |                 |
| Site       | order(4,49..51,58)                                                                                                                                                                                                                                                            |        |        |                 |
|            | /site_type="other"                                                                                                                                                                                                                                                            |        |        |                 |
|            | /note="alpha-amylase binding site [polypeptide binding]"                                                                                                                                                                                                                      |        |        |                 |
|            | /db_xref="CDD:238163"                                                                                                                                                                                                                                                         |        |        |                 |
| Site       | order(38,90,94,100)                                                                                                                                                                                                                                                           |        |        |                 |
|            | /site_type="other"                                                                                                                                                                                                                                                            |        |        |                 |
|            | /note="dimer interface [polypeptide binding]"                                                                                                                                                                                                                                 |        |        |                 |
|            | /db_xref="CDD:238163"                                                                                                                                                                                                                                                         |        |        |                 |
| CDS        | 1..124                                                                                                                                                                                                                                                                        |        |        |                 |
|            | /coded_by="AY729675.1:<1..375"                                                                                                                                                                                                                                                |        |        |                 |
