# Supplementary material for: Effects of Germination on Protein, γ-Aminobutyric Acid, Phenolic Acids, and Antioxidant Capacity in Wheat
Source: MDPI journal article supplement (doi:10.3390/molecules23092244), 2018-09-03
Supplement: s1 [file s1]

Protein View: CDJ26374.1

unnamed protein product [Triticum aestivum]

Database:NCBIprot

Score:91

Expect:0.0046

Monoisotopic mass (M<sub>r</sub>):21704

Calculated pI:7.81

Taxonomy:[Triticum aestivum](#)

Sequence similarity is available as [an NCBI BLAST search of CDJ26374.1 against nr](#).

Search parameters

Enzyme:Trypsin: cuts C-term side of KR unless next residue is P.

Fixed modifications:[Carbamidomethyl \(C\)](#)

Variable modifications:[Oxidation \(M\)](#)

Mass values searched:14

Mass values matched:7

Protein sequence coverage: 35%

Matched peptides shown in ***bold red***.

1MSTKLLNSLSLRRLLGQQRNPIDLYTASRAWSSSTSFSGVHEKNGMGVEA

51DGDVADSWKDAEFRGVYRA**AIICGSVGQVPVQK**KLRLNGHIVTVFTVGTGGM

101**FDQRR**AGAENLPMFAQWHRI**AVHNEQLGTYAVQKL**VKNAAVYVEGDIETR

151VYNDDINNLLVKIVPEICVRF**DGKIHLVQSGSDVSK**SLEELREGLF

Unformatted sequence string: [196 residues](#) (for pasting into other applications).

Sort by☒residue number☐increasing mass☐decreasing mass

Show☒matched peptides only☐predicted peptides also

| Start – End | Observed  | Mr (expt) | Mr (calc) | Delta M   | Peptide                                  |
|-------------|-----------|-----------|-----------|-----------|------------------------------------------|
| 69 – 82     | 1455.7576 | 1454.7503 | 1454.7915 | -0.0412 0 | R.AIICGSVGQVPVQK.K                       |
| 86 – 104    | 2036.0053 | 2034.9980 | 2034.9946 | 0.0034 0  | R.NGHIVTVFTVGTGGMFDQR.R                  |
| 86 – 105    | 2192.0987 | 2191.0914 | 2191.0957 | -0.0043 1 | R.NGHIVTVFTVGTGGMFDQRR.A                 |
| 86 – 105    | 2208.1004 | 2207.0931 | 2207.0906 | 0.0025 1  | R.NGHIVTVFTVGTGGMFDQRR.A + Oxidation (M) |
| 120 – 137   | 2011.0116 | 2010.0043 | 2010.1262 | -0.1219 1 | R.IAVHNEQLGTYAVQKLVK.N                   |
| 170 – 186   | 1773.9525 | 1772.9452 | 1772.9057 | 0.0395 1  | R.FDGKIHVLVQSGGSDVSK.S                   |
| 174 – 186   | 1326.6217 | 1325.6144 | 1325.6939 | -0.0795 0 | K.IHLVQSGGSDVSK.S                        |

No match to: 881.1379, 1346.6736, 1516.8052, 1555.6874, 2087.0213, 2095.0477, 2211.1042

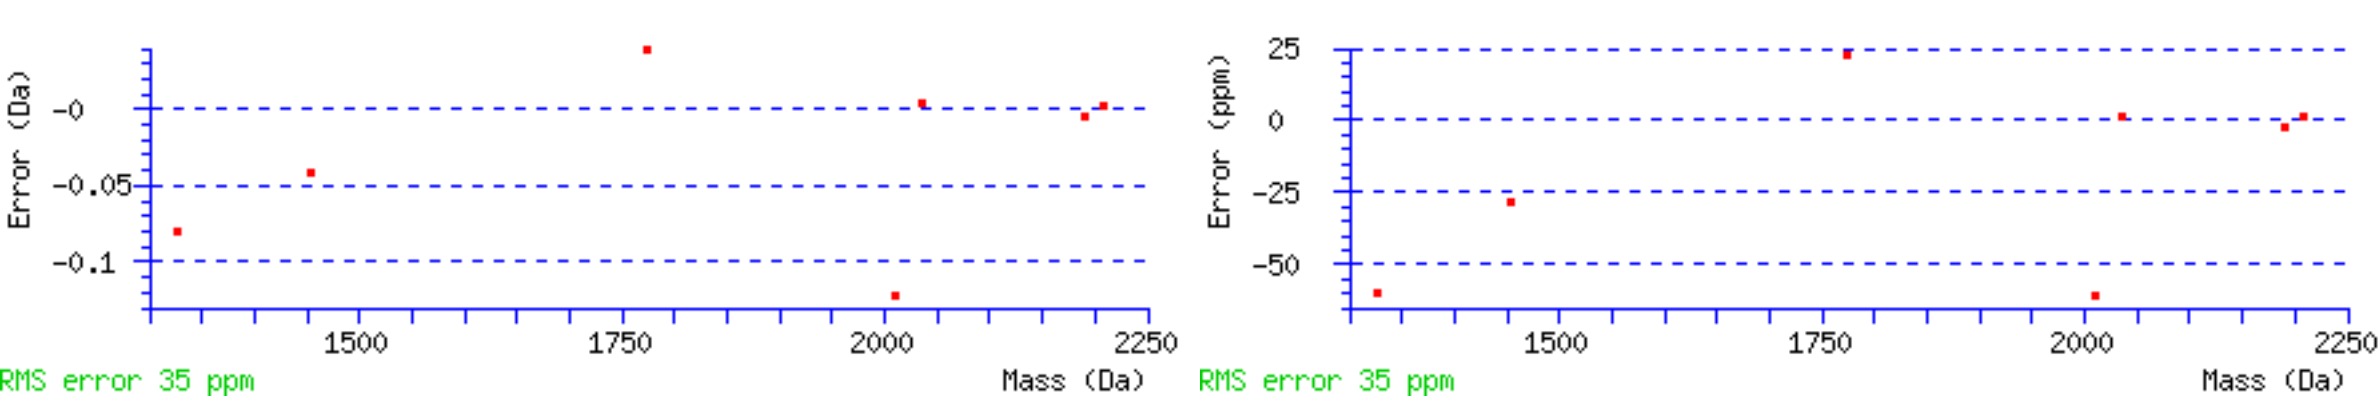

|            |                                                                     |        |        |                 |
|------------|---------------------------------------------------------------------|--------|--------|-----------------|
| LOCUS      | CDJ26374                                                            | 196 aa | linear | PLN 28-JUL-2014 |
| DEFINITION | unnamed protein product [Triticum aestivum].                        |        |        |                 |
| ACCESSION  | CDJ26374                                                            |        |        |                 |
| VERSION    | CDJ26374.1                                                          |        |        |                 |
| DBLINK     | BioProject: PRJEB4376                                               |        |        |                 |
|            | BioSample: SAMEA3146289                                             |        |        |                 |
| DBSOURCE   | embl accession CBUC010000088.1                                      |        |        |                 |
| KEYWORDS   | .                                                                   |        |        |                 |
| SOURCE     | Triticum aestivum (bread wheat)                                     |        |        |                 |
| ORGANISM   | Triticum aestivum                                                   |        |        |                 |
|            | Eukaryota; Viridiplantae; Streptophyta; Embryophyta; Tracheophyta;  |        |        |                 |
|            | Spermatophyta; Magnoliophyta; Liliopsida; Poales; Poaceae; BOP      |        |        |                 |
|            | clade; Pooideae; Triticeae; Triticeae; Triticeae; Triticum.         |        |        |                 |
| REFERENCE  | 1                                                                   |        |        |                 |
| AUTHORS    | Choulet,F., Alberti,A., Theil,S., Glover,N., Barbe,V., Daron,J.,    |        |        |                 |
|            | Pingault,L., Sourdille,P., Couloux,A., Paux,E., Leroy,P.,           |        |        |                 |
|            | Mangenot,S., Guilhot,N., Le Gouis,J., Balfourier,F., Alaux,M.,      |        |        |                 |
|            | Jamilloux,V., Poulain,J., Durand,C., Bellec,A., Gaspin,C.,          |        |        |                 |
|            | Safar,J., Dolezel,J., Rogers,J., Vandepoele,K., Aury,J.M.,          |        |        |                 |
|            | Mayer,K., Berges,H., Quesneville,H., Wincker,P. and Feuillet,C.     |        |        |                 |
| TITLE      | Structural and functional partitioning of bread wheat chromosome 3B |        |        |                 |
| JOURNAL    | Science 345 (6194), 1249721 (2014)                                  |        |        |                 |
| PUBMED     | 25035497                                                            |        |        |                 |
| REFERENCE  | 2 (residues 1 to 196)                                               |        |        |                 |
| AUTHORS    | Choulet,F.                                                          |        |        |                 |
| TITLE      | Direct Submission                                                   |        |        |                 |
| JOURNAL    | Submitted (22-AUG-2012) Genetics Diversity and Ecophysiology of     |        |        |                 |
|            | Cereals, INRA UBP UMR 1095, 234 avenue du Brezet, Clermont-Ferrand, |        |        |                 |
|            | F-63100, FRANCE                                                     |        |        |                 |
| FEATURES   | Location/Qualifiers                                                 |        |        |                 |
| source     | 1..196                                                              |        |        |                 |
|            | /organism="Triticum aestivum"                                       |        |        |                 |
|            | /cultivar="Chinese Spring"                                          |        |        |                 |
|            | /db_xref="taxon:4565"                                               |        |        |                 |
|            | /chromosome="3B"                                                    |        |        |                 |
|            | /note="contig v443_0549"                                            |        |        |                 |
| Protein    | 1..196                                                              |        |        |                 |
|            | /function="conserved unknown function - B9FEN7_ORYSJ                |        |        |                 |
|            | TrEMBL databank Putative uncharacterized protein OS Oryza           |        |        |                 |
|            | sativa subsp japonica GN OsJ_14429 PE 4 SV 1"                       |        |        |                 |
|            | /name="unnamed protein product"                                     |        |        |                 |
| CDS        | 1..196                                                              |        |        |                 |
|            | /locus_tag="TRAES_3BF054900050CFD_c1"                               |        |        |                 |
|            | /coded_by="join(CBUC010000088.1:383185..383251,                     |        |        |                 |
|            | CBUC010000088.1:383345..383481,                                     |        |        |                 |
|            | CBUC010000088.1:383568..383776,                                     |        |        |                 |
|            | CBUC010000088.1:383902..384002,                                     |        |        |                 |
|            | CBUC010000088.1:384445..384504,                                     |        |        |                 |
|            | CBUC010000088.1:384801..384817)"                                    |        |        |                 |
|            | /note="Low Confidence"                                              |        |        |                 |
